1 **Title:** Fly-CURE, a Multi-institutional CURE using *Drosophila*, Increases Students' Confidence,  
2 Sense of Belonging, and Persistence in Research

3  
4 **Authors:** Julie A. Merkle<sup>1</sup>, Olivier Devergne<sup>2</sup>, Seth M. Kelly<sup>3</sup>, Paula A. Croonquist<sup>4</sup>, Cory J.  
5 Evans<sup>5</sup>, Melanie A. Hwalek<sup>6</sup>, Victoria L. Straub<sup>6</sup>, Danielle R. Hamill<sup>7</sup>, David P. Puthoff<sup>8</sup>,  
6 Kenneth J. Saville<sup>9</sup>, Jamie L. Siders<sup>10</sup>, Zully J. Villanueva Gonzalez<sup>11</sup>, Jackie K. Wittke-  
7 Thompson<sup>12</sup>, Kayla L. Bieser<sup>13</sup>, Joyce Stamm<sup>1</sup>, Alysia D. Vrailas-Mortimer<sup>14,15</sup>, Jacob D.  
8 Kagey<sup>16\*\*</sup>

9  
10 **Affiliations:** <sup>1</sup>University of Evansville, <sup>2</sup>Northern Illinois University, <sup>3</sup>The College of Wooster,  
11 <sup>4</sup>Anoka Ramsey Community College, <sup>5</sup>Loyola Marymount University, <sup>6</sup>SPEC Associates, <sup>7</sup>Ohio  
12 Wesleyan University, <sup>8</sup>Frostburg State University, <sup>9</sup>Albion College, <sup>10</sup>Ohio Northern University,  
13 <sup>11</sup>Western New Mexico University, <sup>12</sup>University of St. Francis, <sup>13</sup>Nevada State College, <sup>14</sup>Illinois  
14 State University, <sup>15</sup>Oregon State University, <sup>16</sup>University of Detroit Mercy

15  
16 \*\*Corresponding author: email: [kageyja@udmercy.edu](mailto:kageyja@udmercy.edu); telephone: +1 313-993-1408

17  
18 **Running head:** Impacts of Fly-CURE on student outcomes

19  
20 **Sources of support:** NSF IUSE grant 2021146 to JDK, KLB, JS, and ADV-M; NIH  
21 ReBUILDetroit grant UL1GM118982, TL4GM118983, and RL5GM118981 to JDK, MAH, and  
22 VLS

23

24 **Number of figures:** 6

25 **Number of tables:** 0

26 **Supplemental materials:** Appendix 1, Appendix 2, Supplemental Figures 1-4

27

28 **Conflict of Interest Notification**

29 The authors certify that they have no conflicts of interest to disclose.

30

31 **Abstract**

32           The Fly-CURE is a genetics-focused multi-institutional Course-Based Undergraduate  
33 Research Experience (CURE) that provides undergraduate students with hands-on research  
34 experiences within a course. Through the Fly-CURE, undergraduate students at diverse types of  
35 higher education institutions across the United States map and characterize novel mutants isolated  
36 from a genetic screen in *Drosophila melanogaster*. To evaluate the impact of the Fly-CURE  
37 experience on students, we developed and validated assessment tools to identify students'  
38 perceived research self-efficacy, sense of belonging in science, and intent to pursue additional  
39 research opportunities. Our data show gains in these metrics after completion of the Fly-CURE  
40 across all student subgroups analyzed, including comparisons of gender, academic status, racial  
41 and ethnic groups, and parents' educational background. Importantly, our data also show  
42 differential gains in the areas of self-efficacy and interest in seeking additional research  
43 opportunities between Fly-CURE students with and without prior research experience, illustrating  
44 the positive impact of research exposure (dosage) on student outcomes. Altogether, our data  
45 indicate that the Fly-CURE experience has a significant impact on students' efficacy with research  
46 methods, sense of belonging to the scientific community, and interest in pursuing additional  
47 research experiences.

48

49 **Keywords:** *Drosophila*, CURE, undergraduate research, pedagogy, genetics, STEM, education

## 50 INTRODUCTION

51 As undergraduate STEM education continues to evolve and make improvements that  
52 facilitate the training of scientists from diverse backgrounds, it is becoming increasingly apparent  
53 that an authentic research experience is key for promoting student persistence within STEM majors  
54 and for adequate preparation for future scientific careers. There has been a national call for all  
55 STEM majors to have such an experience during their undergraduate education (1, 2), however, a  
56 significant challenge to this call is simple logistics. While some undergraduates do participate in a  
57 traditional apprentice-based research experience, there is not enough research lab capacity to  
58 accommodate all undergraduate STEM majors (3). One response to limited research opportunities  
59 has been to incorporate authentic research experience(s) into the curriculum. Such courses, often  
60 referred to as CUREs (Course-based Undergraduate Research Experiences), provide a research  
61 experience to a larger number of students (approximately 20-25 students per faculty or teaching  
62 assistant mentor) within a single iteration (3–5). Several CURE-type endeavors have been  
63 developed and, consequently, have provided research opportunities to a far greater number of  
64 STEM undergraduates than would have been possible through mentored bench research alone (5–  
65 11).

66 CURE participation positively impacts science education in several ways. In comparison  
67 with traditional apprenticeships, CUREs not only reach more students, but also represent a more  
68 inclusive approach to research (3, 12). Student participation in CUREs has been shown to enhance  
69 critical thinking skills (10, 13), increase learning gains, bolster scientific identity (14, 15), and  
70 increase interest in science and scientific research (16). Each of these outcomes is likely an  
71 important factor driving the positive correlation between student participation in CUREs and  
72 increased STEM retention rates, including for underrepresented minority students (11, 17, 18).

73 Faculty, departments, and the scientific community at large can also be positively impacted  
74 by implementing CURE pedagogies. Faculty at Primarily Undergraduate Institutions (PUIs)  
75 typically have a heavy teaching requirement (teaching 3-4 classes per semester is not uncommon)  
76 that often comes with the additional expectation of research productivity (19). CUREs provide  
77 such faculty with an opportunity to combine teaching and research into a single endeavor that can,  
78 when properly structured and implemented, produce publishable work (both research data  
79 collected/analyzed by the students and pedagogical data measuring the impact on students) (16,  
80 17, 20, 21). However, setting up a successful CURE comes with many challenges, the largest of  
81 which is typically the identification of a research project that is feasible for undergraduates  
82 working within the confines of a laboratory course (meeting 1-2 times per week, 3-5 hours total),  
83 budget-friendly, and longitudinally sustainable. The implementation of CUREs by regional and  
84 national consortia has been successful in overcoming many of these challenges. Efforts such as  
85 Science Education Alliance (SEA-PHAGES), Genomics Education Partnership (GEP), and Small  
86 World Initiative, have had success with CURE implementation at multiple sites, due in part to  
87 offering established, ready-to-go projects that entice faculty participation by reducing the burden  
88 of identifying a suitable research project and developing the infrastructure to support these projects  
89 (22–24). Not only does this approach provide research opportunities for more students, but it also  
90 increases the amount of valuable undergraduate-generated data. In addition, faculty and student  
91 participants are typically authors on research papers that include their contributing data. Here we  
92 describe a new CURE consortium called Fly-CURE that utilizes *Drosophila melanogaster* as a  
93 research model in undergraduate genetics laboratory courses.

94 The Fly-CURE was established in 2012 at the University of Detroit Mercy and centers on  
95 characterizing and mapping novel EMS-induced mutations isolated in a genetic screen for genes

96 that regulate cell growth and cell division within the developing *Drosophila* eye (25). In the Fly-  
97 CURE, students start with an uncharacterized mutant and, in its analysis, learn about and utilize a  
98 variety of techniques commonly taught in more traditional undergraduate genetics laboratory  
99 courses. The Fly-CURE curriculum includes, but is not limited to classical Mendelian genetics,  
100 molecular genetics, and bioinformatics. Over the last ten years, students participating in the Fly-  
101 CURE have characterized over twenty novel *Drosophila* mutations, which have been published in  
102 eleven publications and included 581 student co-authors (26–36). Currently, the Fly-CURE is  
103 being taught at over twenty institutions across the United States. The institutional diversity of the  
104 Fly-CURE consortium has allowed us to measure the impact of the Fly-CURE pedagogy on a  
105 variety of student attitudes, including their sense of belonging in STEM, research competency, and  
106 intent to continue toward a STEM career. We also evaluated the effect of dosage on these metrics,  
107 where dosage refers to research experiences that a student participated in prior to participation in  
108 the Fly-CURE research project. Assessing the impact of research experience “dosage” on STEM  
109 undergraduates participating in the Fly-CURE consortium may shed light upon whether there is a  
110 critical number of research experiences that impact students’ retention and ultimate success in  
111 STEM fields.

112

## 113 **METHODS**

### 114 **Fly-CURE consortium: institutions, faculty, and student participants**

115 Pre- and post-survey data were gathered from 480 Fly-CURE students over three academic  
116 years: 2019-2020, 2020-2021, and 2021-2022. The demographics of the participating schools and  
117 students are detailed in Appendix 1 and shown in Figure 2. In the years of data collection and in  
118 the data presented, there were 15 faculty who implemented the Fly-CURE across 14 institutions.

119 All participating students were asked to complete a voluntary online survey before  
120 beginning (pre-course) and after completing (post-course) a Fly-CURE course offering (see Figure  
121 1A for workflow). Approval to assess students was obtained by each participating institution from  
122 their Institutional Review Board. After each semester, responses were collected and analyzed by  
123 SPEC Associates (Southfield, MI), an independent analytics firm specializing in education and  
124 learning. Confidentiality was maintained by providing each instructor with a unique link to the  
125 online surveys that could be distributed to students. SurveyMonkey was the online platform used,  
126 with completed surveys being directly received by SPEC Associates without the instructors' ability  
127 to see responses. The components of the pre- and post-course surveys used for this study are  
128 available in Appendix 2.

129 From the 895 students invited to participate in the surveys, we received 740 completed pre-  
130 course surveys and 683 completed post-course surveys. Only data in which students took both the  
131 pre- and post-course surveys were used in our analysis (69% of surveys were pre-/post-test  
132 matched). Pre- and post-survey responses were matched based on answers to non-identifying  
133 questions such as childhood home address. Student attentiveness was also assessed using one  
134 inattentive item on both the pre- and post-survey. Students who did not respond accordingly were  
135 eliminated from the analysis. Ternovski and Orr provide evidence that survey respondents who are  
136 inattentive also provide less reliable demographic data and are systematically different from  
137 attentive respondents (37). Following analysis for student attentiveness and pre-/post-test pairing,  
138 65% of surveys were included in our current study. The number of surveys used in each  
139 comparative analysis differed because some students responded to only a subset of the survey  
140 items.



141 Participants identified their gender as female (69%), male (28%), their gender was not  
142 listed (1%), or they preferred not to say (2%). Participants were from ethnic or racial groups  
143 classified by the NSF as underrepresented in STEM (27%) and groups not considered  
144 underrepresented in STEM (73%). Demographic groups who were considered underrepresented  
145 in STEM were the following: Native Hawaiian or other Pacific Islander (original peoples),  
146 American Indian or Alaskan Native, Black or African American (including African and  
147 Caribbean), and Hispanic or Latino. Demographic groups who were not considered  
148 underrepresented in STEM included students who identified as White, Asian (including  
149 subcontinent and Philippines), and of Middle Eastern descent. Participants also reported whether  
150 either parent attended any college (continued-generation college students, 71%) or neither parent  
151 attended any college (first-generation college students, 29%). Moreover, student participants  
152 ranged in academic year (4% first-year students, 34% second-year students, 31% third-year  
153 students, 29% fourth-year students, and 2% students who already had a bachelor's degree). For  
154 our study, we combined first- and second-year students (38% of participants) and third-year  
155 students and beyond (62%).

156

### 157 **Measure of research experience and dosage**

158 Pre-course surveys asked participants to report any research-associated experiences prior  
159 to the Fly-CURE. Refer to pre-survey question 7 (Appendix 2) for the specific experiences listed.  
160 Students who chose “yes” to any of these experiences were considered as having prior research  
161 exposure, while those who did not choose “yes” to any of these questions were considered as not  
162 having prior research exposure.

163

164 **Fly-CURE outcome measures**

165 Survey items for assessing research self-efficacy and sense of belonging were adapted from  
166 items used in the evaluation of the National Institutes of Health's Building Infrastructure Leading  
167 to Diversity (BUILD) initiative. This retrospective pre-/post-survey method of measuring  
168 outcomes is commonly used when there is a possibility that students' understanding of the  
169 constructs, such as what a research-intensive science laboratory course is, changes as a result of  
170 participating in the course and eliminates the possibility of a response shift bias in the data (38).  
171 For each evaluated outcome, students self-reported their pre- and post-course confidence or  
172 agreement with specific matrices using a 1-5 Likert scale.

173 *Research self-efficacy:* Pre- and post-course surveys asked students to report their  
174 perceived abilities and confidence for eight statements (Appendix 2, pre-survey question 8 and  
175 post-survey question 4). The scores from all eight questions were added together, resulting in a  
176 scale ranging from 8 to 40. Psychometric analysis of the pre- and post-course survey data revealed  
177 that this scale had a coefficient alpha of 0.918 for the pre-survey and 0.975 for the post-course  
178 survey, indicating these items measure the same construct.

179 *Sense of belonging in science:* Pre- and post-course surveys asked students to report their  
180 perceived agreement with four statements (Appendix 2, pre-survey question 9 and post-survey  
181 question 5). To determine scale scores, the results from all four questions were added together,  
182 resulting in a scale of 4 to 20. Psychometric analysis revealed that this scale had coefficient alphas  
183 of 0.863 and 0.935 for the pre- and post-course surveys, respectively.

184 *Intent to pursue additional research opportunities:* Post-course surveys asked participants  
185 to report their perceived intentions before and after taking the course. Students reported their  
186 likelihood to do each of the following: (i) enroll in another research-intensive science laboratory

187 course; (ii) pursue or continue independent research in a science laboratory; (iii) pursue a career  
188 as a scientist (Appendix 2, post-survey questions 1-3). The scores from all three questions were  
189 analyzed separately or added together on a scale of 3 to 15. Psychometric analysis showed that this  
190 scale had a coefficient alpha of 0.861 for the pre-survey and 0.789 for the post-course survey.

191

## 192 **Statistical analyses**

193 Independent groups and paired t-tests were used to assess the statistical significance of  
194 differences in the means within the same students from pre- to post-course (paired t-tests) and  
195 between different groups of students (independent groups t-tests). Levene's Test for Equality of  
196 Variances was used to test for homogeneity of variance.

197 The mean scores for the three outcome scales were calculated in two ways: the scale score  
198 means and the gain score mean. Two scale score means are calculated for each outcome, a pre-  
199 and a post-course scale score mean, representing the average of student scale scores. The scale  
200 score mean may underestimate change because some students may have rated themselves the  
201 highest possible score on the pre-course survey. If they also rate themselves the highest possible  
202 score on the post-course survey, the difference between the pre- and post-course scores is zero.  
203 These students may have rated themselves even higher on the post-course survey, but the  
204 maximum possible score presented a ceiling for them. Thus, the scale score mean includes these  
205 zeros and deflates the mean score for the group. To account for this, a second mean score was  
206 calculated using the normalized gain score. The gain score removes students with the highest  
207 possible pre-course score from the analysis and examines the degree of change among students  
208 who *could* change because they did not reach the ceiling score on the pre-course survey (39). The  
209 equation used to calculate the normalized gain score is:  $Normalized\ Gain = (Post\text{-}score - Pre\text{-}$

210 *score*)/(Maximum possible score - Pre-score). The data presented herein include both the scale  
211 score mean and the mean gain scores for all statistical comparisons.

212

## 213 RESULTS

### 214 The Fly-CURE focuses on the genomic mapping and phenotypic characterization of EMS- 215 induced mutant lines involved in *Drosophila* eye development

216 At the beginning of each semester, all required *Drosophila* stocks were shipped to  
217 participating institutions. *Drosophila* mutant stocks contain previously generated EMS-induced  
218 mutations on the right arm of chromosome 2 (2R) (25). These mutations were previously identified  
219 based on homozygous recessive lethality and a growth-associated phenotype in the *Drosophila*  
220 eye when cell death is also blocked, but the genomic locus of the mutations is unknown (26, 27,  
221 29–35). The identified mutants serve as the basis for phenotypic eye characterization,  
222 complementation mapping, and molecular analysis modules of the Fly-CURE (Figure 1A,B).

223 The Fly-CURE is a lab research project that includes both an initial “Discovery Phase” and  
224 a subsequent “Inquiry Phase” (Figure 1A). An initial pre-survey (Appendix 2) is first completed  
225 by all participating students to gather information about general student demographics, prior  
226 research experience, research self-efficacy, and sense of belonging in science. Students then  
227 typically complete an initial “Discovery Phase” of the project to characterize the eye tissue growth  
228 phenotype caused by the EMS-induced mutation and use complementation mapping of the lethal  
229 phenotype with a series of defined chromosomal deletions (40) to identify the genomic locus where  
230 the mutation responsible for the observed phenotype may be found. All recessive lethal EMS-  
231 induced mutations being investigated, as well as the chromosomal deficiencies used for  
232 complementation mapping, are maintained as heterozygotes using a second chromosome balancer

233 causing curly wings (a dominant phenotypic marker; Figure 1A). Therefore, for crosses between  
234 the *Drosophila* mutant stock and stocks containing chromosomal deficiencies along 2R, students  
235 use stereomicroscopes to easily score for the presence (complementation) or absence (failure to  
236 complement) of straight-winged flies (those carrying the mutation and deficiency) among the  
237 progeny. Since the chromosomal deletions used in the first round of complementation mapping  
238 are relatively large and often lack several dozen to hundreds of genes (40), a second round of  
239 complementation tests with smaller deletions and/or chosen null alleles of individual genes within  
240 the specific genomic region identified in the first round of complementation mapping can be  
241 utilized to identify a smaller region where the mutation might be located. Once non-  
242 complementing deficiencies are identified, this concludes the “Discovery Phase” of the CURE.

243         During the “Inquiry Phase”, students develop hypotheses about candidate genes within the  
244 genomic region that fails to complement lethality of the mutation. Student-derived hypotheses  
245 usually focus on why mutations within a specific gene might lead to the observed eye tissue  
246 phenotype or recessive lethality. Typically, students choose genes that have been previously  
247 annotated as being involved in cellular growth control, apoptosis, the cell cycle, or similar  
248 processes. In some cases, the EMS mutation fails to complement a mutant allele of a specific gene  
249 by the second round of crosses (29, 32, 34, 35), allowing students to focus their hypothesis  
250 generation and subsequent molecular analyses on a single gene. Students then isolate genomic  
251 DNA from the mutant and control fly stocks, design PCR primers, and amplify a small (500-1000  
252 nucleotide) region of their chosen gene. The sequence of the amplified region from both the mutant  
253 and control stocks is then determined by Sanger sequencing to identify possible differences  
254 between the heterozygous mutant stock and the wild-type control. Then, students use  
255 bioinformatics approaches to understand protein structure and/or evolutionary conservation of the

256 candidate gene and often present their findings to the rest of the class. Finally, students analyze,  
257 summarize, and connect the data acquired. Different pedagogical assessments are used across the  
258 consortium, including formal lab reports, poster presentations, and micropublication-style  
259 manuscripts. At the end of the semester, a post-survey was completed to assess whether the  
260 semester-long Fly-CURE impacted students' sense of belonging within the scientific community,  
261 feelings of self-efficacy in research, and motivation to pursue other future research experiences or  
262 STEM careers.

263

264 **Fly-CURE is a modular research experience that can be implemented in a variety of**  
265 **laboratory classes**

266 The modular nature of Fly-CURE allows for components to be organized or omitted to  
267 meet the learning objectives and scheduling variability of different courses (Figure 1B). For  
268 example, most courses that have implemented the Fly-CURE have been upper-level genetics  
269 classes that also contain a laboratory component (Figure 1C, n=9). These combined lecture and  
270 lab courses, along with stand-alone genetics laboratory courses that lack a separate lecture  
271 component (n=4), typically utilize all modules of the Fly-CURE (Figure 1B, version 1). However,  
272 the Fly-CURE has also been implemented in Introductory Biology (n=1), a sophomore-level  
273 Molecular Biology course (n=1), and Anatomy and Physiology (n=1). In these non-genetics-  
274 centered classes, other variations of the Fly-CURE have been implemented that lack one or more  
275 of the modules contained in Fly-CURE version 1 (Figure 1B). Thus, while Fly-CURE has been  
276 mostly implemented in genetics courses, its adaptability and student-focused nature have allowed  
277 a wide variety of courses to participate in this course-embedded research experience.

278           While the modularity and adaptability of the Fly-CURE have allowed for its  
279 implementation in a variety of courses, we also wanted to assess whether faculty using this CURE  
280 could do so successfully without prior research experience with *Drosophila*. We surveyed faculty  
281 who had implemented the Fly-CURE and found that only slightly more than half (53%, n=8), had  
282 previously trained as a graduate student or postdoctoral fellow in a research lab where *Drosophila*  
283 *melanogaster* was utilized as a genetic model organism (Figure 1D). Together, these data suggest  
284 that Fly-CURE can be widely implemented in a variety of courses and that extensive prior training  
285 or experience in a *Drosophila* research lab by the faculty instructor is not a requisite for Fly-CURE  
286 implementation.

287

288   **The Fly-CURE provides research experiences at a range of institutions and for a broad**  
289 **spectrum of student participants**

290           One motivation for the development of the Fly-CURE was to establish opportunities for  
291 collaboration between faculty and students at different institutions. Faculty were recruited to  
292 participate in Fly-CURE through a variety of methods, including discussions at conferences, social  
293 media, and word-of-mouth. The cohort of faculty collaborating on the Fly-CURE spanned several  
294 types of institutions (Figure 2A). Approximately equal numbers of faculty at Primarily  
295 Undergraduate Institutions (PUIs, n=6) and non-R2 graduate degree-granting institutions (n=5)  
296 have implemented the Fly-CURE into at least one course. In addition, the Fly-CURE has been  
297 implemented at R2 institutions (n=3) and at a community college (n=1), where undergraduate  
298 research experiences are typically limited due to a variety of factors including teaching load and  
299 institutional resources (3, 41, 42). Approximately 20% of institutions where the Fly-CURE has  
300 been taught over the last three years are also classified as Minority Serving Institutions (MSIs)

301 (Figure 2B). Regular virtual meetings between participating faculty serve to foster collaboration  
302 between classes characterizing the same *Drosophila* mutation and have also culminated in eight  
303 collaborative micropublications consisting entirely of student-generated data (27, 29–35).

304         Among all students who have participated in the Fly-CURE, 27% self-identify as belonging  
305 to a demographic group underrepresented in STEM (Figure 2C) and 29% of students are first-  
306 generation college students (Figure 2D). In addition, only slightly more than half (52.5%) of  
307 students had any research exposure before the Fly-CURE (Figure 2E). Of the students who  
308 previously participated in a research experience, most had participated in a course-based research  
309 experience (Figure 2F), while only 26% of students had participated in a mentored apprenticeship-  
310 style research experience. Given the significant positive impacts that research experiences have on  
311 undergraduate STEM majors (43) and the dearth of mentored research experiences typically  
312 available to many undergraduate students, these data suggest that CUREs provide an important  
313 alternative to traditional apprentice-style research positions. While first-year undergraduate  
314 research experiences have been shown to be particularly important for the retention of STEM  
315 majors (44), the correlation between the number of research experiences a student participates in  
316 and student outcomes has been less well-studied. In particular, course-embedded research  
317 experiences like the Fly-CURE provide an additional “dose” of research to a large number of  
318 students, and in so doing, further promote student self-efficacy in research, sense of belonging in  
319 the scientific community, and pursuit of STEM careers.

320

### 321 **Impact of the Fly-CURE on student self-efficacy in research**

322         To evaluate the impact of the Fly-CURE experience on students’ research self-efficacy,  
323 sense of belonging in science, and student interest in pursuing additional research experiences,



324 pre- and/or post-course surveys were used to ask students about their confidence or level of  
325 agreement with multiple statements focused on these areas. Likert scale responses for questions  
326 focused on each metric were tallied to generate scale scores. Lower scale scores represent less  
327 confidence or agreement with associated statements, while higher scale scores represent students  
328 who reported more confidence or agreement with included statements.

329 As a first measurement of Fly-CURE effectiveness, we analyzed students' sense of  
330 research self-efficacy. Students ranked their confidence in response to eight statements pertaining  
331 to this metric on pre- and post-course surveys (see Methods and Appendix 2). Students reported  
332 increased self-efficacy in research from pre-course to post-course, shown as an increase in scale  
333 score means (Figure 3A) and as a mean gain score (Figure 3B). We were also interested in whether  
334 the Fly-CURE closed gaps in research self-efficacy for specific student subgroups that are  
335 underrepresented in STEM, thereby providing a path to increased diversity in STEM. Interestingly,  
336 female students reported lower confidence in research pre-course (28.0 for females, 29.2 for males)  
337 and surpassed males in reported self-efficacy post-course (31.5 for females, 31.0 for males) (Figure  
338 3C), resulting in a gain in research self-efficacy for both male and female students (Figure 3D).  
339 Although all student subgroups reported significant gains in their self-efficacy in research post-  
340 course, there were no statistically significant differences in the degree of reported gains in research  
341 self-efficacy between students in the evaluated subgroups, including race and ethnicity (Figure 3E,  
342 Supplemental Figure 1A,B), education background of parents (Figure 3E, Supplemental Figure  
343 1C,D), and academic year (Supplemental Figure 1E,F).

344

345 **Impact of the Fly-CURE on student sense of belonging in the scientific community**

346 Pre- and post-course surveys were also used to evaluate the effectiveness of the Fly-CURE  
347 in increasing student sense of belonging in science by asking students to rate their level of  
348 agreement with four statements (see Methods and Appendix 2). Pre- and post-course sense of  
349 belonging scales were generated by adding each student's ratings on the four items.

350 Similar to their reported gains in research self-efficacy, students reported an increased  
351 sense of belonging in the scientific community post-course compared to pre-course. This is shown  
352 as scale score means (Figure 4A) and as a mean gain score (Figure 4B). We also compared student  
353 subgroups in several demographic categories and found that although all student subgroups  
354 reported gains in their feelings of belonging in science post-course, there were no statistically  
355 significant differences in the degree of reported gains between subgroups in each evaluated  
356 category, including gender (Figure 4C,D), race and ethnicity (Figure 4E, Supplemental Figure 2A-  
357 B), education background of parents (Figure 4E, Supplemental Figure 2C,D), and academic year  
358 (Supplemental Figure 2E,F). These data suggest that students from underrepresented backgrounds  
359 participating in Fly-CURE make similar gains as their peers. It is worth noting that similar to  
360 research self-efficacy, female participants reported a lower sense of belonging in science pre-  
361 course (12.2) compared to males (13.1), but yet reached a score similar to males post-course (13.8  
362 for females, 14.0 for males) (Figure 4C). This suggests that the Fly-CURE experience allows  
363 female students to increase their perceived sense of belonging in science, thereby narrowing the  
364 gender gap in STEM.

365

### 366 **Impact of the Fly-CURE on student intention to pursue additional research opportunities**

367 To evaluate the effectiveness of the Fly-CURE in increasing student intention to pursue  
368 additional research-associated experiences, post-course surveys asked participants to rate their

369 perceived likelihood to seek out additional research opportunities before and after taking the course  
370 for three questions (see Methods and Appendix 2). Much like the reported gains in research self-  
371 efficacy and sense of belonging in science, students also reported a perceived increase in their  
372 intention to pursue additional research experiences after completing the Fly-CURE. This can be  
373 observed as scale score means (Figure 5A), as a mean for each type of experience evaluated (Figure  
374 5B), and as a mean gain score for each type of experience (Figure 5C). It is worth noting that all  
375 student subgroups analyzed tend to start at a similar level of perceived intent to pursue the  
376 experiences proposed before the course and have a similar level of intent after the course  
377 (Supplemental Figure 3). Altogether, these data highlight the positive impact that the Fly-CURE  
378 has on encouraging confidence, belonging, and persistence in science for students who participate  
379 in a CURE during their undergraduate education.

380

### 381 **Impact of the Fly-CURE on students with and without previous research experiences**

382 While much of our data support previously reported impacts that CUREs have on student  
383 gains (42, 48), thereby highlighting the effectiveness of the Fly-CURE experience for students, we  
384 were also interested in evaluating the impacts of the Fly-CURE on students with or without  
385 research experience prior to taking a Fly-CURE course. In a pre-course survey, students were  
386 asked which specific research experiences, if any, they had prior to beginning the Fly-CURE  
387 project (see Methods and Appendix 2). Approximately 53% of students reported having had  
388 research experience of some kind before starting the Fly-CURE (Figure 2E).

389 Students with and without prior research experience reported gains in self-efficacy in  
390 research (Figure 6A) and sense of belonging in the scientific community (Figure 6C) after  
391 completing the Fly-CURE. Interestingly, however, students without prior research experience

392 reported a greater gain in research self-efficacy after the Fly-CURE, suggesting that the Fly-CURE  
393 serves as a valuable research experience for those students and makes strides in increasing their  
394 confidence in conducting research (Figure 6B). On the contrary, students with and without prior  
395 research experience did not exhibit differential gains in their sense of belonging to the scientific  
396 community (Figure 6D). It is important to note, however, that the mean sense of belonging score  
397 for students without prior research experience post-course (13.3) surpassed the pre-course score  
398 for students with prior research experience (13.0) (Figure 6C). This indicates that the research  
399 experience component of the Fly-CURE increases students' sense of belonging in science from  
400 baseline and suggests that there may be a dose-dependent relationship between the number of  
401 research experiences a student has and students' sense of belonging in the scientific community.

402         Next, we evaluated whether the Fly-CURE had differing impacts on students' intention to  
403 pursue additional research opportunities depending on whether students entered the CURE with or  
404 without prior research experience. In particular, we questioned whether participating in at least  
405 one research experience before the Fly-CURE resulted in a greater increase in students' intent to  
406 seek out future research experiences compared to those without prior research experience. We  
407 found that although interest in gaining additional future experiences increased for all students  
408 (Figure 5A, Supplemental Figure 3), differential outcomes were observed, depending on the type  
409 of experience and whether students had research experience before taking the Fly-CURE course  
410 (Figure 6E-G). When students were asked whether they were interested in enrolling in another  
411 research-intensive laboratory course such as a CURE, students with prior research experience  
412 exhibited a greater gain in intent to pursue this experience, as shown by the gain score mean post-  
413 Fly-CURE compared to pre-Fly-CURE ( $P \leq 0.05$ ) (Figure 6E; scale score mean data in  
414 Supplemental Figure 4A). Similarly, students with prior research experience reported a greater

415 gain in their intent to pursue or continue independent research in a scientific research laboratory  
416 than students without prior research experience ( $P \leq 0.05$ ) (Figure 6F; Supplemental Figure 4B).  
417 These data support the hypothesis that increased dosage in research experiences positively  
418 correlates with increases in student interest to persist in research. The only category in which  
419 students with and without prior research experience did not show differential outcomes was for  
420 intention to pursue a career as a scientist (Figure 6G; Supplemental Figure 4C). Regardless of the  
421 extent of prior research experience, students reported a very similar increase in intent to become  
422 scientists post-Fly-CURE as they did before Fly-CURE, suggesting that additional exposure to  
423 research does not significantly increase, beyond the initial positive impact, students' interest to  
424 pursue a career in STEM.

425 Altogether, our data show that all students, regardless of demographic profile and previous  
426 exposure to research, show an increase in research self-efficacy, sense of belonging in science, and  
427 interest in pursuing additional research experiences after taking a Fly-CURE course. In addition,  
428 students without prior research experience show a statistically significant gain in self-efficacy  
429 compared with students with prior research experience; while students with prior experience in  
430 research show a statistically significant gain in interest to seek out additional research  
431 opportunities, but no significant increase in intent to pursue a career as a scientist.

432

## 433 **DISCUSSION**

434 The Fly-CURE is a versatile authentic research experience that can be implemented in a  
435 modular fashion across course and/or institution types, and without requiring prior experience with  
436 *Drosophila melanogaster* (Figure 1B-D and Figure 2A,B). Thus, the Fly-CURE consortium is a  
437 large and diverse sample for measuring the impact of course-embedded research on student

438 attitudes regarding self-efficacy in research, sense of belonging in science, intent to pursue  
439 additional research experiences, and the impact of previous research experiences (dosage) on these  
440 metrics. Prior studies have suggested that increased time spent on a task and research dosage  
441 positively impact student outcomes and persistence in STEM (45, 46). However, it has been  
442 suggested that persisting in science may require “a commitment of 10 or more hours per week over  
443 two or more semesters of faculty-mentored research” (3, 45). Therefore, we investigated the  
444 relationship between research exposure and its impacts on students’ retention, belonging, and  
445 confidence in STEM.

446 Overall, gains were reported by Fly-CURE students for scientific self-efficacy and sense  
447 of belonging, as well as for their intent to persist in STEM. Our analysis shows that all participating  
448 students, including groups considered underrepresented in STEM, females, and first-generation  
449 college students, reported increased confidence in research-associated skills (Figure 3 and  
450 Supplemental Figure 1), sense of belonging in science (Figure 4 and Supplemental Figure 2), and  
451 interest in pursuing additional research experiences (Figure 5 and Supplemental Figure 3) after the  
452 Fly-CURE. These are gains previously reported by others and our data supports the growing notion  
453 that CUREs are inclusive and have a positive impact on undergraduate STEM education (10, 11,  
454 13–17).

455 Further, the fact that Fly-CURE is successfully implemented by faculty at a wide range of  
456 institutions (e.g., PUI, CC, MSI, and R2), a variety of courses, and by faculty without prior  
457 experience with *Drosophila* demonstrates the adaptable nature of the Fly-CURE. This also  
458 exemplifies the effectiveness of the Fly-CURE consortium for providing authentic research  
459 experiences for an increased number of STEM students. Traditional apprentice-based research  
460 experiences are often limited in availability, budget, and/or capacity, rendering the need for course-

461 based experiences. However, one of the barriers to starting a CURE is having a project that is  
462 sustainable and feasible within the confines of an undergraduate curriculum. Additional barriers  
463 to CURE implementation exist for some institutional types such as community colleges (47).  
464 Nevertheless, community college students have comparable knowledge and perceived outcomes  
465 gains as non-community college counterparts when engaging in centrally supported CUREs,  
466 demonstrating the need for these research experiences to be accessible to all students (41, 42). The  
467 versatility associated with the modular nature of experiments in the Fly-CURE, as well as the  
468 diverse range of institutions at which the Fly-CURE has been implemented successfully, highlight  
469 its value for both students and curricula.

470 While other research endeavors have looked at dosage in terms of how much time a  
471 researcher spends on a single project (45, 46), we were able to investigate whether a separate  
472 previous research experience had an impact on changes in attitude resulting from the Fly-CURE  
473 (Figure 6 and Supplemental Figure 4). There were two lessons that emerged from our findings that  
474 could impact how undergraduate STEM departments incorporate research into their curriculum.  
475 The first is that students with no self-reported previous research experience demonstrated gains in  
476 both research self-efficacy and sense of belonging after a single semester of research (Figure 6A-  
477 D). Perhaps not surprisingly, these students reported a more significant gain in research self-  
478 efficacy than their classmates who had previous research experience (Figure 6A,B). This may be  
479 one of the most promising aspects of the Fly-CURE as a pedagogy to broaden participation in  
480 institutions where research opportunities are especially limited, such as two-year institutions with  
481 the most diverse student populations. Additionally, students with prior research experience  
482 reported a more significant gain in their intent to enroll in another research-intensive course and  
483 pursue independent research in a science lab (Figure 6E,F), highlighting a correlation between

484 increased dosage and interest to persist in research. However, both students with and without prior  
485 research experience showed similar gains in their intent to pursue a career as a scientist (Figure  
486 6G), suggesting that career plans might be less subjective to research exposure dosage. It is worth  
487 noting that the future career plans for many Fly-CURE participants might be in STEM-related  
488 careers, such as health professions, but not necessarily in laboratory research. Thereby, we predict  
489 that most respondents perceived a “career as a scientist” as a bench or field scientist, rather than a  
490 health-centered career. In the future, it would be enlightening to offer more specific career avenues  
491 to better appreciate the impact of the Fly-CURE on participants’ career interests.

492 Overall, these data show that participation in the Fly-CURE, as a single research  
493 experience, increases these metrics, even if this CURE is the student's first research experience.  
494 Second, those students who had previous research experience also had statistically significant  
495 gains after completing the Fly-CURE, suggesting that all students have room to grow for the  
496 metrics analyzed in the second (or beyond) research experience. From our data, we cannot  
497 conclude how many research experiences would saturate these reported gains; however, we think  
498 it is reasonable to hypothesize that additional research experiences would result in additional gains  
499 in these areas. Future studies should specifically evaluate the critical number of research  
500 experiences associated with these and other student outcomes. Nonetheless, our data support  
501 previous evidence on the impacts of CUREs, thereby further underlining the importance for  
502 undergraduate STEM departments to incorporate one (or more) research experiences into the  
503 standardized curriculum.



504 **ACKNOWLEDGEMENTS**

505 We thank all Fly-CURE students who completed surveys and contributed to this work, as well as  
506 Alexandra Peister at Morehouse College and Clare Kron, Elizabeth Taylor, Hemin Shah, and  
507 Sandesh Pandit at NIU. Thanks also to the Bloomington *Drosophila* Stock Center, especially  
508 Kevin Cook and Cale Whitworth, for generously providing stocks. Figure 1A was made using  
509 BioRender.com. The research was supported by NSF IUSE grant 2021146 to JDK, KLB, JS, and  
510 ADV-M and NIH ReBUILDetroit grants UL1GM118982, TL4GM118983, and RL5GM118981  
511 to JDK, VLS, and MAH.

512

513 **REFERENCES**

- 514 1. Woodin T, Carter VC, Fletcher L. 2010. Vision and Change in Biology Undergraduate  
515 Education, A Call for Action—Initial Responses. *CBE—Life Sci Educ* 9:71–73.
- 516 2. Vision and Change in Undergraduate Biology Education » About V&C: A Call to Action  
517 (2011). <https://visionandchange.org/about-vc-a-call-to-action-2011/>. Retrieved 29  
518 November 2022.
- 519 3. Bangera G, Brownell SE. 2014. Course-Based Undergraduate Research Experiences Can  
520 Make Scientific Research More Inclusive. *CBE—Life Sci Educ* 13:602–606.
- 521 4. Elgin SCR, Hauser C, Holzen TM, Jones C, Kleinschmit A, Leatherman J. 2017. The GEP:  
522 Crowd-Sourcing Big Data Analysis with Undergraduates. *Trends Genet* 33:81–85.
- 523 5. Shaffer CD, Alvarez C, Bailey C, Barnard D, Bhalla S, Chandrasekaran C, Chandrasekaran  
524 V, Chung H-M, Dorer DR, Du C, Eckdahl TT, Poet JL, Frohlich D, Goodman AL, Gosser  
525 Y, Hauser C, Hoopes LLM, Johnson D, Jones CJ, Kaehler M, Kokan N, Kopp OR, Kuleck

- 526 GA, McNeil G, Moss R, Myka JL, Nagengast A, Morris R, Overvoorde PJ, Shoop E,  
527 Parrish S, Reed K, Regisford EG, Revie D, Rosenwald AG, Saville K, Schroeder S, Shaw  
528 M, Skuse G, Smith C, Smith M, Spana EP, Spratt M, Stamm J, Thompson JS, Wawersik M,  
529 Wilson BA, Youngblom J, Leung W, Buhler J, Mardis ER, Lopatto D, Elgin SCR. 2010.  
530 The Genomics Education Partnership: Successful Integration of Research into Laboratory  
531 Classes at a Diverse Group of Undergraduate Institutions. *CBE—Life Sci Educ* 9:55–69.
- 532 6. Tootle T, Hoffmann D, Allen A, Spracklen A, Groen C, Kelpsich D. 2019. Research and  
533 Teaching: Mini-Course-Based Undergraduate Research Experience: Impact on Student  
534 Understanding of STEM Research and Interest in STEM Programs. *J Coll Sci Teach* 048.
- 535 7. Delventhal R, Steinhauer J. 2020. A course-based undergraduate research experience  
536 examining neurodegeneration in *Drosophila melanogaster* teaches students to think,  
537 communicate, and perform like scientists. *PLOS ONE* 15:e0230912.
- 538 8. Mills A, Jaganatha V, Cortez A, Guzman M, Burnette JM, Collin M, Lopez-Lopez B,  
539 Wessler SR, Van Norman JM, Nelson DC, Rasmussen CG. 2021. A Course-Based  
540 Undergraduate Research Experience in CRISPR-Cas9 Experimental Design to Support  
541 Reverse Genetic Studies in *Arabidopsis thaliana*. *J Microbiol Biol Educ* 22:e00155-21.
- 542 9. Murren CJ, Wolyniak MJ, Rutter MT, Bisner AM, Callahan HS, Strand AE, Corwin LA.  
543 2019. Undergraduates Phenotyping *Arabidopsis* Knockouts in a Course-Based  
544 Undergraduate Research Experience: Exploring Plant Fitness and Vigor Using Quantitative  
545 Phenotyping Methods. *J Microbiol Biol Educ* 20:10.

- 546 10. Brownell SE, Hekmat-Scafe DS, Singla V, Chandler Seawell P, Conklin Imam JF, Eddy  
547 SL, Stearns T, Cyert MS. 2015. A High-Enrollment Course-Based Undergraduate Research  
548 Experience Improves Student Conceptions of Scientific Thinking and Ability to Interpret  
549 Data. *CBE—Life Sci Educ* 14:ar21, 1–14.
- 550 11. Hanauer DI, Graham MJ, SEA-PHAGES, Betancur L, Bobrownicki A, Cresawn SG,  
551 Garlena RA, Jacobs-Sera D, Kaufmann N, Pope WH, Russell DA, Jacobs WR, Sivanathan  
552 V, Asai DJ, Hatfull GF, Actis L, Adair T, Adams S, Alvey R, Anders K, Anderson WA,  
553 Antoniaci L, Ayuk M, Baliraine F, Balish M, Ball S, Barbazuk B, Barezzi N, Barrera A,  
554 Berkes C, Best A, Bhalla S, Blumer L, Bollivar D, Bonilla JA, Borges K, Bortz B,  
555 Breakwell D, Breitenberger C, Breton T, Brey C, Bricker JS, Briggs L, Broderick E,  
556 Brooks TD, Brown-Kennerly V, Buckholt M, Butela K, Byrum C, Cain D, Carson S,  
557 Caruso S, Caslake L, Chia C, Chung H-M, Clase K, Clement B, Conant S, Connors B,  
558 Coomans R, D’Angelo W, D’Elia T, Daniels CJ, Daniels L, Davis B, DeCourcy K, DeJong  
559 R, Delaney-Nguyen K, Delesalle V, Diaz A, Dickson L, Doty J, Doyle E, Dunbar D,  
560 Easterwood J, Eckardt M, Edgington N, Elgin S, Erb M, Erill I, Fast K, Fillman C, Findley  
561 A, Fisher E, Fleischacker C, Fogarty M, Frederick G, Frost V, Furbee E, Gainey M,  
562 Gallegos I, Gissendanner C, Golebiewska U, Grose J, Grubb S, Guild N, Gurney S, Hartzog  
563 G, Hatherill JR, Hauser C, Hendrickson H, Herren C, Hinz J, Ho E, Hope S, Hughes L,  
564 Hull A, Hutchison K, Isern S, Janssen G, Jarvik J, Johnson A, Jones N, Kagey J, Kart M,  
565 Katsanos J, Keener T, Kenna M, King R, King-Smith C, Kirkpatrick B, Klyczek K, Koch  
566 H, Koga A, Korey C, Krukoni G, Kurt B, Leadon S, LeBlanc-Straceski J, Lee J, Lee-Soety  
567 J, Lewis L, Limeri L, Little J, Llano M, Lopez J, MacLaren C, Makemson J, Martin S,  
568 Mavrodi D, McGuier N, McKinney A, McLean J, Merkhofer E, Michael S, Miller E,

- 569 Mohan S, Molloy S, Monsen-Collar K, Monti D, Moyer A, Neitzel J, Nelson P, Newman  
570 R, Noordewier B, Olapade O, Ospina-Giraldo M, Page S, Paige-Anderson C, Pape-Zambito  
571 D, Park P, Parker J, Pedulla M, Peister A, Pfaffle P, Pirino G, Pizzorno M, Plymale R,  
572 Pogliano J, Pogliano K, Powell A, Poxleitner M, Preuss M, Reyna N, Rickus J, Rinehart C,  
573 Robinson C, Rodriguez-Lanetty M, Rosas-Acosta G, Ross J, Rowland N, Royer D, Rubin  
574 M, Sadana R, Saha M, Saha S, Sandel M, Sasek T, Saunders L, Saville K, Scherer A,  
575 Schildbach J, Schroeder S, Schwebach JR, Seegulam M, Segura-Totten M, Shaffer C,  
576 Shanks R, Sipprell A, Slowan-Pomeroy T, Smith K, Smith MA, Smith-Caldas M, Stamm J,  
577 Stockwell S, Stowe E, Stuke J, Sunnen CN, Tarbox B, Taylor S, Temple L, Timmerman  
578 M, Tobiason D, Tolsma S, Torres M, Twichell C, Valle-Rivera AM, Vazquez E,  
579 Villagomez J, Voshell S, Wallen J, Ward R, Ware V, Warner M, Washington J, Weir S,  
580 Wertz J, Westholm D, Weston-Hafer K, Westover K, Whitefleet-Smith J, Wiedemeier A,  
581 Wolyniak M, Yan W, Zegers GP, Zhang D, Zimmerman A. 2017. An inclusive Research  
582 Education Community (iREC): Impact of the SEA-PHAGES program on research  
583 outcomes and student learning. *Proc Natl Acad Sci* 114:13531–13536.
- 584 12. Duboue ER, Kowalko JE, Keene AC. 2022. Course-based undergraduate research  
585 experiences (CURES) as a pathway to diversify science. *Evol Dev* 24:127–130.
- 586 13. Jordan TC, Burnett SH, Carson S, Caruso SM, Clase K, DeJong RJ, Dennehy JJ, Denver  
587 DR, Dunbar D, Elgin SCR, Findley AM, Gissendanner CR, Golebiewska UP, Guild N,  
588 Hartzog GA, Grillo WH, Hollowell GP, Hughes LE, Johnson A, King RA, Lewis LO, Li  
589 W, Rosenzweig F, Rubin MR, Saha MS, Sandoz J, Shaffer CD, Taylor B, Temple L,  
590 Vazquez E, Ware VC, Barker LP, Bradley KW, Jacobs-Sera D, Pope WH, Russell DA,  
591 Cresawn SG, Lopatto D, Bailey CP, Hatfull GF. 2014. A Broadly Implementable Research

- 592 Course in Phage Discovery and Genomics for First-Year Undergraduate Students. *mBio*  
593 5:e01051-13.
- 594 14. Cooper KM, Knope ML, Munstermann MJ, Brownell SE. 2020. Students Who Analyze  
595 Their Own Data in a Course-Based Undergraduate Research Experience (CURE) Show  
596 Gains in Scientific Identity and Emotional Ownership of Research. *J Microbiol Biol Educ*  
597 21:60.
- 598 15. Bhatt JM, Challa AK. 2018. First Year Course-Based Undergraduate Research Experience  
599 (CURE) Using the CRISPR/Cas9 Genome Engineering Technology in Zebrafish. *J*  
600 *Microbiol Biol Educ* 19:19.1.30.
- 601 16. Evans CJ, Olson JM, Mondal BC, Kandimalla P, Abbasi A, Abdusamad MM, Acosta O,  
602 Ainsworth JA, Akram HM, Albert RB, Alegria-Leal E, Alexander KY, Ayala AC,  
603 Balashova NS, Barber RM, Bassi H, Bennion SP, Beyder M, Bhatt KV, Bhoot C, Bradshaw  
604 AW, Brannigan TG, Cao B, Cashell YY, Chai T, Chan AW, Chan C, Chang I, Chang J,  
605 Chang MT, Chang PW, Chang S, Chari N, Chassiakos AJ, Chen IE, Chen VK, Chen Z,  
606 Cheng MR, Chiang M, Chiu V, Choi S, Chung JH, Contreras L, Corona E, Cruz CJ, Cruz  
607 RL, Dang JM, Dasari SP, De La Fuente JRO, Del Rio OMA, Dennis ER, Dertsakyan PS,  
608 Dey I, Distler RS, Dong Z, Dorman LC, Douglass MA, Ehresman AB, Fu IH, Fua A, Full  
609 SM, Ghaffari-Rafi A, Ghani AA, Giap B, Gill S, Gill ZS, Gills NJ, Godavarthi S,  
610 Golnazarian T, Goyal R, Gray R, Grunfeld AM, Gu KM, Gutierrez NC, Ha AN, Hamid I,  
611 Hanson A, Hao C, He C, He M, Hedtke JP, Hernandez YK, Hlaing H, Hobby FA, Hoi K,  
612 Hope AC, Hosseinian SM, Hsu A, Hsueh J, Hu E, Hu SS, Huang S, Huang W, Huynh M,  
613 Javier C, Jeon NE, Ji S, Johal J, John A, Johnson L, Kadakia S, Kakade N, Kamel S, Kaur

614 R, Khatra JS, Kho JA, Kim C, Kim EJ-K, Kim HJ, Kim HW, Kim JH, Kim SA, Kim WK,  
615 Kit B, La C, Lai J, Lam V, Le NK, Lee CJ, Lee D, Lee DY, Lee J, Lee J, Lee J, Lee J-Y,  
616 Lee S, Lee TC, Lee V, Li AJ, Li J, Libro AM, Lien IC, Lim M, Lin JM, Liu CY, Liu SC,  
617 Louie I, Lu SW, Luo WY, Luu T, Madrigal JT, Mai Y, Miya DI, Mohammadi M, Mohanta  
618 S, Mokwena T, Montoya T, Mould DL, Murata MR, Muthaiya J, Naicker S, Neebe MR,  
619 Ngo A, Ngo DQ, Ngo JA, Nguyen AT, Nguyen HCX, Nguyen RH, Nguyen TTT, Nguyen  
620 VT, Nishida K, Oh S-K, Omi KM, Onglatco MC, Almazan GO, Paguntalan J, Panchal M,  
621 Pang S, Parikh HB, Patel PD, Patel TH, Petersen JE, Pham S, Phan-Everson TM, Pokhriyal  
622 M, Popovich DW, Quaal AT, Querubin K, Resendiz A, Riabkova N, Rong F, Salarkia S,  
623 Sama N, Sang E, Sanville DA, Schoen ER, Shen Z, Siangchin K, Sibal G, Sin G, Sjarif J,  
624 Smith CJ, Soeboer AN, Sosa C, Spitters D, Stender B, Su CC, Summapund J, Sun BJ,  
625 Sutanto C, Tan JS, Tan NL, Tangmatitam P, Trac CK, Tran C, Tran D, Tran D, Tran V,  
626 Truong PA, Tsai BL, Tsai P-H, Tsui CK, Uriu JK, Venkatesh S, Vo M, Vo N-T, Vo P,  
627 Voros TC, Wan Y, Wang E, Wang J, Wang MK, Wang Y, Wei S, Wilson MN, Wong D,  
628 Wu E, Xing H, Xu JP, Yaftaly S, Yan K, Yang E, Yang R, Yao T, Yeo P, Yip V, Yogi P,  
629 Young GC, Yung MM, Zai A, Zhang C, Zhang XX, Zhao Z, Zhou R, Zhou Z, Abutouk M,  
630 Aguirre B, Ao C, Baranoff A, Beniwal A, Cai Z, Chan R, Chien KC, Chaudhary U, Chin P,  
631 Chowdhury P, Dalie J, Du EY, Estrada A, Feng E, Ghaly M, Graf R, Hernandez E, Herrera  
632 K, Ho VW, Honeychurch K, Hou Y, Huang JM, Ishii M, James N, Jang G-E, Jin D, Juarez  
633 J, Kesaf AE, Khalsa SK, Kim H, Kovsky J, Kuang CL, Kumar S, Lam G, Lee C, Lee G, Li  
634 L, Lin J, Liu J, Ly J, Ma A, Markovic H, Medina C, Mungcal J, Naranbaatar B, Patel K,  
635 Petersen L, Phan A, Phung M, Priasti N, Ruano N, Salim T, Schnell K, Shah P, Shen J,  
636 Stutzman N, Sukhina A, Tian R, Vega-Loza A, Wang J, Wang J, Watanabe R, Wei B, Xie

637 L, Ye J, Zhao J, Zimmerman J, Bracken C, Capili J, Char A, Chen M, Huang P, Ji S, Kim  
638 E, Kim K, Ko J, Laput SLG, Law S, Lee SK, Lee O, Lim D, Lin E, Marik K, Mytych J,  
639 O’Laughlin A, Pak J, Park C, Ryu R, Shinde A, Sosa M, Waite N, Williams M, Wong R,  
640 Woo J, Woo J, Yepuri V, Yim D, Huynh D, Wijewarnasurya D, Shapiro C, Levis-  
641 Fitzgerald M, Jaworski L, Lopatto D, Clark IE, Johnson T, Banerjee U. 2021. A functional  
642 genomics screen identifying blood cell development genes in *Drosophila* by undergraduates  
643 participating in a course-based research experience. *G3 Genes Genomes Genet* 11:jkaa028,  
644 1–23.

645 17. Olson JM, Evans CJ, Ngo KT, Kim HJ, Nguyen JD, Gurley KGH, Ta T, Patel V, Han L,  
646 Truong-N KT, Liang L, Chu MK, Lam H, Ahn HG, Banerjee AK, Choi IY, Kelley RG,  
647 Moridzadeh N, Khan AM, Khan O, Lee S, Johnson EB, Tigranyan A, Wang J, Gandhi AD,  
648 Padhiar MM, Calvopina JH, Sumra K, Ou K, Wu JC, Dickan JN, Ahmadi SM, Allen DN,  
649 Mai VT, Ansari S, Yeh G, Yoon E, Gon K, Yu JY, He J, Zaretsky JM, Lee NE, Kuoy E,  
650 Patananan AN, Sitz D, Tran P, Do M-T, Akhave SJ, Alvarez SD, Asem B, Asem N,  
651 Azarian NA, Babaesfahani A, Bahrami A, Bhamra M, Bhargava R, Bhatia R, Bhatia S,  
652 Bumacod N, Caine JJ, Caldwell TA, Calica NA, Calonico EM, Chan C, Chan HH-L, Chang  
653 A, Chang C, Chang D, Chang JS, Charania N, Chen JY, Chen K, Chen L, Chen Y, Cheung  
654 DJ, Cheung JJ, Chew JJ, Chew NB, Chien C-AT, Chin AM, Chin CJ, Cho Y, Chou MT,  
655 Chow K-HK, Chu C, Chu DM, Chu V, Chuang K, Chugh AS, Cubberly MR, Daniel MG,  
656 Datta S, Dhaliwal R, Dinh J, Dixit D, Dowling E, Feng M, From CM, Furukawa D,  
657 Gaddipati H, Gevorgyan L, Ghaznavi Z, Ghosh T, Gill J, Groves DJ, Gurara KK, Haghighi  
658 AR, Havard AL, Heyrani N, Hioe T, Hong K, Houman JJ, Howland M, Hsia EL, Hsueh J,  
659 Hu S, Huang AJ, Huynh JC, Huynh J, Iwuchukwu C, Jang MJ, Jiang AA, Kahlon S, Kao P-

660 Y, Kaur M, Keehn MG, Kim EJ, Kim H, Kim MJ, Kim SJ, Kitich A, Kornberg RA,  
661 Kouzelos NG, Kuon J, Lau B, Lau RK, Law R, Le HD, Le R, Lee C, Lee C, Lee GE, Lee  
662 K, Lee MJ, Lee RV, Lee SHK, Lee SK, Lee S-LD, Lee YJ, Leong MJ, Li DM, Li H, Liang  
663 X, Lin E, Lin MM, Lin P, Lin T, Lu S, Luong SS, Ma JS, Ma L, Maghen JN, Mallam S,  
664 Mann S, Melehani JH, Miller RC, Mittal N, Moazez CM, Moon S, Moridzadeh R, Ngo K,  
665 Nguyen HH, Nguyen K, Nguyen TH, Nieh AW, Niu I, Oh S-K, Ong JR, Oyama RK, Park  
666 J, Park YA, Passmore KA, Patel A, Patel AA, Patel D, Patel T, Peterson KE, Pham AH,  
667 Pham SV, Phuphanich ME, Poria ND, Pourzia A, Ragland V, Ranat RD, Rice CM, Roh D,  
668 Rojhani S, Sadri L, Saguros A, Saifee Z, Sandhu M, Scruggs B, Scully LM, Shih V, Shin  
669 BA, Sholklipper T, Singh H, Singh S, Snyder SL, Sobotka KF, Song SH, Sukumar S,  
670 Sullivan HC, Sy M, Tan H, Taylor SK, Thaker SK, Thakore T, Tong GE, Tran JN, Tran J,  
671 Tran TD, Tran V, Trang CL, Trinh HG, Trinh P, Tseng H-CH, Uotani TT, Uraizee AV, Vu  
672 KKT, Vu KKT, Wadhvani K, Walia PK, Wang RS, Wang S, Wang SJ, Wiredja DD, Wong  
673 AL, Wu D, Xue X, Yanez G, Yang Y-H, Ye Z, Yee VW, Yeh C, Zhao Y, Zheng X,  
674 Ziegenbalg A, Alkali J, Azizkhanian I, Bhakta A, Berry L, Castillo R, Darwish S,  
675 Dickinson H, Dutta R, Ghosh RK, Guerin R, Hofman J, Iwamoto G, Kang S, Kim A, Kim  
676 B, Kim H, Kim K, Kim S, Ko J, Koenig M, LaRiviere A, Lee C, Lee J, Lung B, Mittelman  
677 M, Murata M, Park Y, Rothberg D, Sprung-Keyser B, Thaker K, Yip V, Picard P, Diep F,  
678 Villarasa N, Hartenstein V, Shapiro C, Levis-Fitzgerald M, Jaworski L, Loppato D, Clark  
679 IE, Banerjee U. 2019. Expression-Based Cell Lineage Analysis in *Drosophila* Through a  
680 Course-Based Research Experience for Early Undergraduates. *G3 Genes Genomes Genet*  
681 9:3791–3800.



- 682 18. Rodenbusch SE, Hernandez PR, Simmons SL, Dolan EL. 2016. Early Engagement in  
683 Course-Based Research Increases Graduation Rates and Completion of Science,  
684 Engineering, and Mathematics Degrees. *CBE Life Sci Educ* 15:ar20.
- 685 19. Freeman EA, Theodosiou NA, Anderson WJ. 2020. From bench to board-side: Academic  
686 teaching careers. *Dev Biol* 459:43–48.
- 687 20. Shortlidge EE, Bangera G, Brownell SE. 2017. Each to Their Own CURE: Faculty Who  
688 Teach Course-Based Undergraduate Research Experiences Report Why You Too Should  
689 Teach a CURE. *J Microbiol Biol Educ* 18:18.2.29.
- 690 21. Shortlidge EE, Bangera G, Brownell SE. 2016. Faculty Perspectives on Developing and  
691 Teaching Course-Based Undergraduate Research Experiences. *BioScience* 66:54–62.
- 692 22. Lopatto D, Alvarez C, Barnard D, Chandrasekaran C, Chung H-M, Du C, Eckdahl T,  
693 Goodman AL, Hauser C, Jones CJ, Kopp OR, Kuleck GA, McNeil G, Morris R, Myka JL,  
694 Nagengast A, Overvoorde PJ, Poet JL, Reed K, Regisford G, Revie D, Rosenwald A,  
695 Saville K, Shaw M, Skuse GR, Smith C, Smith M, Spratt M, Stamm J, Thompson JS,  
696 Wilson BA, Witkowski C, Youngblom J, Leung W, Shaffer CD, Buhler J, Mardis E, Elgin  
697 SCR. 2008. Genomics Education Partnership. *Science* 322:684–685.
- 698 23. Hanauer DI, Graham MJ, Arnold RJ, Ayuk MA, Balish MF, Beyer AR, Butela KA, Byrum  
699 CA, Chia CP, Chung H-M, Clase KL, Conant S, Coomans RJ, D’Elia T, Diaz J, Diaz A,  
700 Doty JA, Edgington NP, Edwards DC, Eivazova E, Emmons CB, Fast KM, Fisher EJ,  
701 Fleischacker CL, Frederick GD, Freise AC, Gainey MD, Gissendanner CR, Golebiewska  
702 UP, Guild NA, Hendrickson HL, Herren CD, Hopson-Fernandes MS, Hughes LE, Jacobs-

- 703 Sera D, Johnson AA, Kirkpatrick BL, Klyczek KK, Koga AP, Kotturi H, LeBlanc-Straceski  
704 J, Lee-Soety JY, Leonard JE, Mastropaolo MD, Merkhofer EC, Michael SF, Mitchell JC,  
705 Mohan S, Monti DL, Noutsos C, Nsa IY, Peters NT, Plymale R, Pollenz RS, Porter ML,  
706 Rinehart CA, Rosas-Acosta G, Ross JF, Rubin MR, Scherer AE, Schroeder SC, Shaffer  
707 CD, Sprenkle AB, Sunnen CN, Swerdlow SJ, Tobiason D, Tolsma SS, Tsourkas PK, Ward  
708 RE, Ware VC, Warner MH, Washington JM, Westover KM, White SJ, Whitefleet-Smith  
709 JL, Williams DC, Wolyniak MJ, Zeilstra-Ryalls JH, Asai DJ, Hatfull GF, Sivanathan V.  
710 2022. Instructional Models for Course-Based Research Experience (CRE) Teaching.  
711 CBE—Life Sci Educ 21:ar8, 1–14.
- 712 24. Caruso JP, Israel N, Rowland K, Lovelace MJ, Saunders MJ. 2016. Citizen Science: The  
713 Small World Initiative Improved Lecture Grades and California Critical Thinking Skills  
714 Test Scores of Nonscience Major Students at Florida Atlantic University. *J Microbiol Biol*  
715 *Educ* 17:156–162.
- 716 25. Neufeld TP, Hariharan IK. 2002. Regulation of Growth and Cell Proliferation During Eye  
717 Development, p. 107–133. *In* Moses, K (ed.), *Drosophila Eye Development*. Springer  
718 Berlin Heidelberg, Berlin, Heidelberg.
- 719 26. Kagey JD, Brown JA, Moberg KH. 2012. Regulation of Yorkie activity in *Drosophila*  
720 imaginal discs by the Hedgehog receptor gene *patched*. *Mech Dev* 129:339–349.
- 721 27. Mast E, Bieser KL, Abraham-Villa M, Adams V, Akinlehin AJ, Aquino LZ, Austin JL,  
722 Austin AK, Beckham CN, Bengson EJ, Bieszk A, Bogard BL, Brennan RC, Brnot RM,  
723 Cirone NJ, Clark MR, Cooper BN, Cruz D, Daprizio KA, DeBoe J, Dencker MM, Donnelly  
724 LL, Driscoll L, DuBeau RJ, Durso SW, Ejub A, Elgosbi W, Estrada M, Evins K, Fox PD,

725 France JM, Franco Hernandez MG, Garcia LA, Garl O, Gorsuch MR, Gorzeman-Mohr  
726 MA, Grothouse ME, Gubbels ME, Hakemiamjad R, Harvey CV, Hoepfner MA, Ivanov JL,  
727 Johnson VM, Johnson JL, Johnson A, Johnston K, Keller KR, Kennedy BT, Killian LR,  
728 Klumb M, Koehn OL, Koym AS, Kress KJ, Landis RE, Lewis KN, Lim E, Lopez IK, Lowe  
729 D, Luengo Carretero P, Lunaburg G, Mallinder SL, Marshall NA, Mathew J, Mathew J,  
730 Mcmanaway HS, Meegan EN, Meyst JD, Miller MJ, Minogue CK, Mohr AA, Moran CI,  
731 Moran A, Morris MD, Morrison MD, Moses EA, Mullins CJ, Neri CI, Nichols JM, Nickels  
732 BR, Okai AM, Okonmah C, Paramo M, Paramo M, Parker SL, Parmar NK, Paschal J, Patel  
733 P, Patel D, Perkins EB, Perry MM, Perry Z, Pollock AA, Portalatin O, Proffitt KS, Queen  
734 JT, Quemeneur AC, Richardson AG, Rosenberger K, Rutherford AM, Santos-Perez IX,  
735 Sarti CY, Schouweiler LJ, Sessing LM, Setaro SO, Silvestri CF, Smith OA, Smith MJ,  
736 Sumner JC, Sutton RR, Sweckard L, Talbott NB, Traxler PA, Truesdell J, Valenti AF,  
737 Verace L, Vijayakumar P, Wadley WL, Walter KE, Williams AR, Wilson TJ, Witbeck MA,  
738 Wobler TM, Wright LJ, Zuczkowska KA, Devergne O, Hamill DR, Shah HP, Siders J,  
739 Taylor EE, Vrailas-Mortimer AD, Kagey JD. 2022. Genetic mapping of *Uba3<sup>0.2.2</sup>*, a pupal  
740 lethal mutation in *Drosophila melanogaster*. MicroPublication Biol 2022.

741 28. Moore SL, Adamini FC, Coopes ES, Godoy D, Northington SJ, Stewart JM, Tillett RL,  
742 Bieser KL, Kagey JD. 2022. *Patched* and *Costal-2* mutations lead to differences in tissue  
743 overgrowth autonomy. *Fly (Austin)* 16:176–189.

744 29. Talley EM, Watts CT, Aboyer S, Adamson MG, Akoto HA, Altemus H, Avella PJ, Bailey  
745 R, Bell ER, Bell KL, Breneman K, Burkhart JS, Chanley LJ, Cook SS, DesLaurier MT,  
746 Dorsey TR, Doyle CJ, Egloff ME, Fasawe AS, Garcia KK, Graves NP, Gray TK, Gustafson  
747 EM, Hall MJ, Hayes JD, Holic LJ, Jarvis BA, Klos PS, Kritzmire S, Kuzovko L, Lainez E,

- 748 McCoy S, Mierendorf JC, Neri NA, Neville CR, Osborn K, Parker K, Parks ME, Peck K,  
749 Pitt R, Platta ME, Powell B, Rodriguez K, Ruiz C, Schaefer MN, Shields AB, Smiley JB,  
750 Stauffer B, Straub D, Sweeney JL, Termine KM, Thomas B, Toth SD, Veile TR, Walker  
751 KS, Webster PN, Woodard BJ, Yoder QL, Young MK, Zeedyk ML, Ziegler LN, Bieser  
752 KL, Puthoff DP, Stamm J, Vrailas-Mortimer AD, Kagey JD, Merkle JA. 2021. Genetic  
753 mapping and phenotypic analysis of *shot*<sup>H.3.2</sup> in *Drosophila melanogaster*. MicroPublication  
754 Biol 2021.
- 755 30. Siders JL, Bieser KL, Hamill DR, Acosta EC, Alexander OK, Ali HI, Anderson MJ,  
756 Arrasmith HR, Azam M, Beeman NJ, Beydoun H, Bishop LJ, Blair MD, Bletch B, Bline  
757 HR, Brown JC, Burns KM, Calagua KC, Chafin L, Christy WA, Ciamacco C, Cizauskas H,  
758 Colwell CM, Courtright AR, Diaz Alavez L, Ecret RI, Edriss F, Ellerbrock TG, Ellis MM,  
759 Extine EM, Feldman E, Fickenworth LJ, Goeller CM, Grogg AS, Hernandez Y, Hershner  
760 A, Jauss MM, Jimenez Garcia L, Franks KE, Kazubski ET, Landis ER, Langub J, Lassek  
761 TN, Le TC, Lee JM, Levine DP, Lightfoot PJ, Love N, Maalhigh-Fard A, Maguire C,  
762 McGinnis BE, Mehta BV, Melendrez V, Mena ZE, Mendell S, Montiel-Garcia P, Murry  
763 AS, Newland RA, Nobles RM, Patel N, Patil Y, Pfister CL, Ramage V, Ray MR, Rodrigues  
764 J, Rodriguez VC, Romero Y, Scott AM, Shaba N, Sieg S, Silva K, Singh S, Spargo AJ,  
765 Spitnale SJ, Sweeden N, Tague L, Tavernini BM, Tran K, Tungol L, Vestal KA, Wetherbee  
766 A, Wright KM, Yeager AT, Zahid R, Kagey JD. 2021. Genetic Mapping of a new *Hippo*  
767 allele, *Hpo*<sup>N.1.2</sup>, in *Drosophila melanogaster*. MicroPublication Biol 2021.
- 768 31. Vrailas-Mortimer AD, Aggarwal N, Ahmed NN, Alberts IM, Alhawasli M, Aljerdi IA,  
769 Allen BM, Alnajar AM, Anderson MA, Armstong R, Avery CC, Avila EJ, Baker TN,  
770 Basardeh S, Bates NA, Beidas FN, Bosler AC, Brewer DM, Buenaventura RS, Burrell NJ,

- 771 Cabrera-Lopez AP, Cervantes-Gonzalez AB, Cezar RP, Coronel J, Croslyn C, Damery KR,  
772 Diaz-Alavez L, Dixit NP, Duarte DL, Emke AR, English K, Eshun AA, Esterly SR, Estrada  
773 AJ, Feng M, Freund MM, Garcia N, Ghotra CS, Ghyasi H, Hale CS, Hulsman L, Jamerson  
774 L, Jones AK, Kuczynski M, Lacey-Kennedy TN, Lee MJ, Mahjoub T, Mersinger MC,  
775 Muckerheide AD, Myers DW, Nielsen K, Nosowicz PJ, Nunez JA, Ortiz AC, Patel TT,  
776 Perry NN, Poser WSA, Puga DM, Quam C, Quintana-Lopez P, Rennerfeldt P, Reyes NM,  
777 Rines IG, Roberts C, Robinson DB, Rossa KM, Ruhlmann GJ, Schmidt J, Sherwood JR,  
778 Shonoda DH, Soellner H, Torrez JC, Velide M, Weinzapfel Z, Ward AC, Bieser KL,  
779 Merkle JA, Stamm JC, Tillett RL, Kagey JD. 2021. *B.2.16* is a non-lethal modifier of the  
780 *Dark*<sup>82</sup> mosaic eye phenotype in *Drosophila melanogaster*. MicroPublication Biol 2021.
- 781 32. Bieser K, Sanford JS, Saville K, Arreola KF, Ayres ZT, Basulto D, Benito S, Breen CJ,  
782 Brix JA, Brown N, Burton KK, Chadwick TM, Chen M, Chu K, Corbett BL, Dill Z,  
783 Faughender MA, Hickey AD, Julia JS, Kelty SS, Kobs BBK, Krason BA, Lam B,  
784 McCullough CL, McEwen BR. 2019. Genetic mapping of *shn*<sup>E.3.2</sup> in *Drosophila*  
785 *melanogaster*. MicroPublication Biol <https://doi.org/10.17912/micropub.biology.000118>.
- 786 33. Bieser KL, Stamm J, Aldo AA, Bhaskara S, Claiborne M, Coronel Gómez JN, Dean R,  
787 Dowell A, Dowell E, Eissa M, Fawaz AA, Fouad-Meshriky MM, Godoy D, Gonzalez K,  
788 Hachem MK, Hammoud MF, Huffman A, Ingram H, Jackman AB, Karki B, Khalil N,  
789 Khalil H, Ha TK, Kharel A, Kobylarz I, Lompfrey H, Lonnberg A, Mahbuba S, Massarani  
790 H, Minster M, Molina K, Molitor L, Murray T, Patel PM, Pechulis S, Raja A, Rastegari G,  
791 Reeves S, Sabu N, Salazar R, Schulert D, Senopole MD, Sportiello K, Torres C, Villalobos  
792 J, Wu J, Zeigler S, Kagey JD. 2018. The Mapping of *Drosophila melanogaster* mutant  
793 A.4.4. MicroPublication Biol.

- 794 34. Stamm J, Joshi G, Anderson MA, Bussing K, Houchin C, Elinsky A, Flyte J, Husseini N,  
795 Jarosz D, Johnson C, Johnson A, Jones C, Kooner T, Myhre D, Rafail T, Sayed S, Swan K,  
796 Toma J, Kagey J. 2019. Genetic mapping of EgfrL.3.1 in *Drosophila melanogaster*.  
797 MicroPublication Biol 2019.
- 798 35. Evans CJ, Bieser KL, Acevedo-Vasquez KS, Augustine EJ, Bowen S, Casarez VA,  
799 Feliciano VI, Glazier A, Guinan HR, Hallman R, Haugan E, Hehr LA, Hunnicutt SN,  
800 Leifer I, Mauger M, Mauger M, Melendez NY, Milshteyn L, Moore E, Nguyen SA,  
801 Phanphouvong SC, Pinal DM, Pope HM, Salinas M-BM, Shellin M, Small I, Yeoh NC,  
802 Yokomizo AMK, Kagey JD. 2022. The *I.3.2* developmental mutant has a single nucleotide  
803 deletion in the gene *centromere identifier*. MicroPublication Biol 2022.
- 804 36. Cosenza A, Kagey JD. 2016. The Mapping and Characterization of *Cruella (Cru)*, a Novel  
805 Allele of *Capping Protein  $\alpha$  (Cpa)*, Identified from a Conditional Screen for Negative  
806 Regulators of Cell Growth and Cell Division. *Adv Biosci Biotechnol* 07:373–380.
- 807 37. Ternovski J, Orr L, Kalla J, Aronow P. 2022. A Note on Increases in Inattentive Online  
808 Survey-Takers Since 2020. *J Quant Descr Digit Media* 2:1–35.
- 809 38. Little TD, Chang R, Gorrall BK, Waggenpack L, Fukuda E, Allen PJ, Noam GG. 2020.  
810 The retrospective pretest–posttest design redux: On its validity as an alternative to  
811 traditional pretest–posttest measurement. *Int J Behav Dev* 44:175–183.
- 812 39. Hake RR. 1998. Interactive-engagement versus traditional methods: A six-thousand-student  
813 survey of mechanics test data for introductory physics courses. *Am J Phys* 66:64–74.

- 814 40. Cook RK, Christensen SJ, Deal JA, Coburn RA, Deal ME, Gresens JM, Kaufman TC, Cook  
815 KR. 2012. The generation of chromosomal deletions to provide extensive coverage and  
816 subdivision of the *Drosophila melanogaster* genome. *Genome Biol* 13:R21, 1–14.
- 817 41. Hanauer DI, Graham MJ, Jacobs-Sera D, Garlena RA, Russell DA, Sivanathan V, Asai DJ,  
818 Hatfull GF. 2022. Broadening Access to STEM through the Community College:  
819 Investigating the Role of Course-Based Research Experiences (CREs). *CBE—Life Sci*  
820 *Educ* 21:ar38, 1–16.
- 821 42. Croonquist P, Falkenberg V, Minkovsky N, Sawa A, Skerritt M, Sustacek MK, Diotti R,  
822 Aragon AD, Mans T, Sherr GL, Ward C, Hall-Woods M, Goodman AL, Reed LK, Lopatto  
823 D. The Genomics Education Partnership: First findings on genomics research in community  
824 colleges. SPUR.
- 825 43. Bowman NA, Holmes JM. 2018. Getting off to a good start? First-year undergraduate  
826 research experiences and student outcomes. *High Educ* 76:17–33.
- 827 44. Neff LS, D’Souza MJ. 2019. Undergraduate Research, Data-Science Courses, and  
828 Volunteer Projects, Inform and Accelerate Wesley College’s Retention Among First- and  
829 Second- Year Students. *Proc Natl Conf Undergrad Res Natl Conf Undergrad Res*  
830 2019:1434.
- 831 45. Hernandez PR, Woodcock A, Estrada M, Schultz PW. 2018. Undergraduate Research  
832 Experiences Broaden Diversity in the Scientific Workforce. *BioScience* 68:204–211.
- 833 46. Shaffer CD, Alvarez CJ, Bednarski AE, Dunbar D, Goodman AL, Reinke C, Rosenwald  
834 AG, Wolyniak MJ, Bailey C, Barnard D, Bazinet C, Beach DL, Bedard JEJ, Bhalla S,

835 Braverman J, Burg M, Chandrasekaran V, Chung H-M, Clase K, DeJong RJ, DiAngelo JR,  
836 Du C, Eckdahl TT, Eisler H, Emerson JA, Frary A, Frohlich D, Gosser Y, Govind S,  
837 Haberman A, Hark AT, Hauser C, Hoogewerf A, Hoopes LLM, Howell CE, Johnson D,  
838 Jones CJ, Kadlec L, Kaehler M, Silver Key SC, Kleinschmit A, Kokan NP, Kopp O,  
839 Kuleck G, Leatherman J, Lopilato J, MacKinnon C, Martinez-Cruzado JC, McNeil G, Mel  
840 S, Mistry H, Nagengast A, Overvoorde P, Paetkau DW, Parrish S, Peterson CN, Preuss M,  
841 Reed LK, Revie D, Robic S, Roecklein-Canfield J, Rubin MR, Saville K, Schroeder S,  
842 Sharif K, Shaw M, Skuse G, Smith CD, Smith MA, Smith ST, Spana E, Spratt M,  
843 Sreenivasan A, Stamm J, Szauter P, Thompson JS, Wawersik M, Youngblom J, Zhou L,  
844 Mardis ER, Buhler J, Leung W, Lopatto D, Elgin SCR. 2014. A Course-Based Research  
845 Experience: How Benefits Change with Increased Investment in Instructional Time. CBE—  
846 Life Sci Educ 13:111–130.

847 47. Hewlett JA. 2018. Broadening Participation in Undergraduate Research Experiences  
848 (UREs): The Expanding Role of the Community College. CBE—Life Sci Educ 17:es9, 1–3.

849

## 850 **FIGURE LEGENDS**

851 **Figure 1. The Fly-CURE is a modular course-embedded research project.** (A) Students  
852 enrolled in the Fly-CURE took an initial survey in which students reported their perceived self-  
853 efficacy in research and sense of belonging in science. The pre-course survey was also used to  
854 collect student demographic information. An FRT/Flp-based approach was used to create mitotic  
855 clones in *Drosophila* eye tissue where tissue homozygous for an EMS-induced mutation was  
856 marked by red pigment and wild-type tissue was marked by the absence of eye pigment. The  
857 growth ability of tissue homozygous for the EMS mutation was assessed by comparing the amount



858 of red (mutant) to white (wild type) tissue within the adult fly eye. In parallel, the genomic locus  
859 of the mutation on chromosome 2R was then determined by complementation mapping with  
860 defined chromosome deletions. Once this initial “discovery” phase was completed, students  
861 initiated a more hypothesis-driven “inquiry” phase of the project. Bioinformatics and molecular  
862 approaches were used to design PCR primers and then amplify and sequence a portion of the  
863 chromosomal region that fails to complement the mutation. Finally, a post-course survey was  
864 implemented to measure the impact of the Fly-CURE on students’ perceived self-efficacy in  
865 research, sense of belonging in science, and intent to pursue additional research experiences or  
866 scientific careers. (B) Different combinations of the Fly-CURE components can be combined in a  
867 modular format, depending on the learning objectives of the course where the Fly-CURE was  
868 implemented (also see Appendix 1). (C) While most courses implementing the Fly-CURE were  
869 genetics courses with a lab or a stand-alone genetics lab course, the Fly-CURE was incorporated  
870 into a variety of other undergraduate Biology courses (Appendix 1). (D) 53% of Fly-CURE  
871 instructors (8 out of 15) had previously worked in a research setting using *Drosophila*  
872 *melanogaster*.

873

874 **Figure 2. Institutional, demographic, and previous research experience of students enrolled**  
875 **in the Fly-CURE.** (A) Institutional profiles where the Fly-CURE was implemented were obtained  
876 from The Carnegie Classification system. Institutions classified as Baccalaureate Colleges were  
877 combined into a single Primarily Undergraduate Institution (PUI) category. Carnegie Institutions  
878 classified as Doctoral/Professional Universities or Master’s Universities were pooled together as  
879 Non-R2, graduate degree-granting institutions. Number of institutions in each category: PUI (n=6),  
880 Non-R2 graduate degree-granting institutions (n=5), R2 (n=3), Community College (n=1) (see

881 Appendix 1). (B) Minority Serving Institution (MSI) data was obtained from The Office of  
882 Postsecondary Education Eligibility Matrix. Number of institutions in each category: Non-MSI  
883 (n=12), Hispanic Serving Institution (HSI, n=1), Historically Black College or University (HBCU)  
884 (n=1), Asian American and Native Pacific Islander Serving Institution (AANAPIS) and HSI (n=1)  
885 (Appendix 1). (C-F) Demographic information from the student pre-course survey was used to  
886 determine the number of students that self-identified as underrepresented in STEM (C) or as first-  
887 generation college students (D). Pre-course survey data was also used to identify whether Fly-  
888 CURE participants had previously obtained research experience (E) and if so, the type of research  
889 experience in which students had participated (F).

890

891 **Figure 3. Self-efficacy in scientific research of student subgroups before and after completing**  
892 **the Fly-CURE.** Through pre- and post-course surveys, students reported their efficacy in specific  
893 skills associated with scientific research before and after participating in the Fly-CURE. The  
894 survey rating scales for eight questions were combined, resulting in a total possible scale score of  
895 40 (y-axis) per student. The mean self-efficacy pre-course (blue) and post-course (yellow) are  
896 shown for all participants (A) and in participant subgroups (C,E). (A-B) Self-efficacy scale score  
897 mean (A) and gain score mean (B) for all Fly-CURE participants. (C-D) Self-efficacy scale score  
898 mean (C) and gain score mean (D) for male and female participants. (E) Comparison of self-  
899 efficacy means pre- and post-course in all students, minority students underrepresented in STEM,  
900 and first-generation college students. Error bars represent  $\pm$  standard error of the mean ( $\pm$  SEM);  
901 ns, not significant,  $P > 0.05$ ; \*\*\*\* $P \leq 0.0001$ .

902

903 **Figure 4. Sense of belonging in the scientific community for student subgroups before and**  
904 **after completing the Fly-CURE.** Through pre- and post-course surveys, students reported their  
905 sense of belonging in the scientific community before and after participating in the Fly-CURE.  
906 The survey rating scales for four questions were combined, resulting in a total possible scale score  
907 of 20 (*y*-axis) per student. The mean scale score for sense of belonging pre-course (blue) and post-  
908 course (yellow) are shown for all participants (A) and in participant subgroups (C,E). (A-B) Sense  
909 of belonging scale score mean (A) and gain score mean (B) for all Fly-CURE participants. (C-D)  
910 Sense of belonging scale score mean (C) and gain score mean (D) for male and female students.  
911 (E) Comparison of reported scale score means for sense of belonging for all participants, minority  
912 students underrepresented in STEM, and first-generation college students. Error bars,  $\pm$ SEM; ns,  
913 not significant,  $P > 0.05$ ; \*\*\* $P \leq 0.001$ ; \*\*\*\* $P \leq 0.0001$ .

914

915 **Figure 5. Student intent to seek additional research experiences before and after completing**  
916 **the Fly-CURE.** Students reported their perceived interest in pursuing additional research-  
917 associated experiences before and after completing the Fly-CURE. The survey rating scales for  
918 three questions were combined, resulting in a maximum scale score of 15 (*y*-axis) per student.  
919 Students were asked to evaluate their perceived interest before and after the CURE in the  
920 categories listed in (B and C). (A-B) Scale score means for interest in seeking additional research  
921 experiences before (blue) compared to after (yellow) the Fly-CURE for all participants. (A) Scale  
922 score means across all categories. (B) Scale score means for individual categories evaluating  
923 student intent to seek additional research opportunities. (C) Gain score means comparing students'  
924 interest in pursuing additional research experiences before and after the Fly-CURE for each  
925 category evaluated. Error bars,  $\pm$ SEM; \* $P \leq 0.05$ ; \*\*\*\* $P \leq 0.0001$ .

926

927 **Figure 6. Impacts of self-efficacy in scientific research, sense of belonging in the scientific**  
928 **community, and intent to seek additional research experiences in students with and without**  
929 **research experience prior to the Fly-CURE.** Through pre- and post-course surveys, students  
930 reported their self-efficacy in scientific research (A-B), sense of belonging in the scientific  
931 community (C-D), interest in pursuing additional research-associated experiences (E-G), and  
932 whether they had research experience prior to the course. (A,C) Scale score mean for research self-  
933 efficacy (A) and sense of belonging in science (C) before (blue) and after (yellow) the Fly-CURE  
934 for participants with and without prior research experience. (B,D) Gain score mean for self-  
935 efficacy (B) and sense of belonging (D) for Fly-CURE participants with and without prior research  
936 experience. (A) For research self-efficacy, the survey rating scales for eight questions were  
937 combined, resulting in a maximum score of 40 (*y*-axis). (C) For sense of belonging in science, the  
938 survey rating scales for four questions were summed, resulting in a combined score of 20 (*y*-axis).  
939 (E-G) Gain score means for students' perceived interest to enroll in another research-intensive  
940 science laboratory course (E), pursue or continue independent research in a research laboratory  
941 (F), and pursue a career as a scientist (G) before and after taking the Fly-CURE. Error bars,  $\pm$ SEM;  
942 ns, not significant,  $P > 0.05$ ;  $*P \leq 0.05$ ;  $****P \leq 0.0001$ .

943

944 **Figure S1. Reported self-efficacy in research for student subgroups before and after**  
945 **completing the Fly-CURE.** The mean self-efficacy pre-course (blue) and post-course (yellow)  
946 scale score means are shown for participant subgroups, as well as the gain score mean (purple) to  
947 compare differential gains in self-efficacy post-course compared to pre-course in student  
948 subgroups. (A-B) Self-efficacy scale score means (A) and gain score mean (B) for minority

949 students underrepresented in STEM and students not considered underrepresented in STEM. (C-  
950 D) Self-efficacy scale score mean (C) and gain score mean (D) for first-generation and continued-  
951 generation college students. (E-F) Self-efficacy scale score mean (E) and gain score mean (F) for  
952 first- or second-year students compared to third-year students and above. Error bars,  $\pm$ SEM; ns,  
953 not significant,  $P > 0.05$ ; \*\*\*\* $P \leq 0.0001$ .

954

955 **Figure S2. Reported sense of belonging in science for student subgroups before and after**  
956 **completing the Fly-CURE.** The scale score means for sense of belonging in the scientific  
957 community pre-course (blue) and post-course (yellow) are shown for participant subgroups, as  
958 well as the gain score mean (purple) to compare differential gains in sense of belonging post-  
959 course compared to pre-course in student subgroups. (A-B) Sense of belonging scale score mean  
960 (A) and gain score mean (B) for minority students underrepresented in STEM and students not  
961 considered underrepresented in STEM. (C-D) Sense of belonging in research scale score mean (C)  
962 and gain score mean (D) for first-generation and continued-generation college students. (E-F)  
963 Sense of belonging scale score mean (E) and gain score mean (F) for first- or second-year students  
964 compared to third-year students and above. Error bars,  $\pm$ SEM; ns, not significant,  $P > 0.05$ ; \*\*\* $P$   
965  $\leq 0.001$ ; \*\*\*\* $P \leq 0.0001$ .

966

967 **Figure S3. Reported intent to seek additional research experiences for student subgroups**  
968 **before and after completing the Fly-CURE.** Comparison of students' perceived interest before  
969 (blue) and after (yellow) the CURE to enroll in another research-intensive science laboratory  
970 course (A,D,G,J), pursue or continue independent research in a research laboratory (B,E,H,K), and  
971 pursue a career as a scientist (C,F,I,L). Scale score means for reported perceived interest in seeking

972 additional research experiences before compared to after the Fly-CURE for male and female  
973 students (A-C), minority students underrepresented in STEM and students not considered  
974 underrepresented in STEM (D-F), first-generation and continued-generation college students (G-  
975 I), and first- or second-year students compared to third-year students and above (J-L). Error bars,  
976  $\pm$ SEM; ns, not significant,  $P > 0.05$ ; \* $P \leq 0.05$ ; \*\* $P \leq 0.01$ ; \*\*\* $P \leq 0.001$ ; \*\*\*\* $P \leq 0.0001$ .

977

978 **Figure S4. Reported intent to seek additional research experiences in students with and**  
979 **without research experience prior to the Fly-CURE.** Through post-surveys, students reported  
980 their perceived interest in pursuing additional research-associated experiences before and after  
981 completing the Fly-CURE. The survey rating scales ranged from one (not likely) to five  
982 (definitely) for the research experiences indicated. Scale score means of perceived student interest  
983 to enroll in another research-intensive science laboratory course (A), pursue or continue  
984 independent research in a research laboratory (B), and pursue a career as a scientist (C) before  
985 (blue) and after (yellow) taking the Fly-CURE for students who reported as having or not having  
986 research experience prior to the Fly-CURE. Error bars,  $\pm$ SEM; \* $P \leq 0.05$ ; \*\*\*\* $P \leq 0.0001$ .

987

## 988 SUPPLEMENTAL MATERIALS

989 Appendix 1: Institutional and student demographics tables

990 Appendix 2: Pre- and post-surveys

991 Supplemental Figures 1-4

## Impacts of Fly-CURE on student outcomes

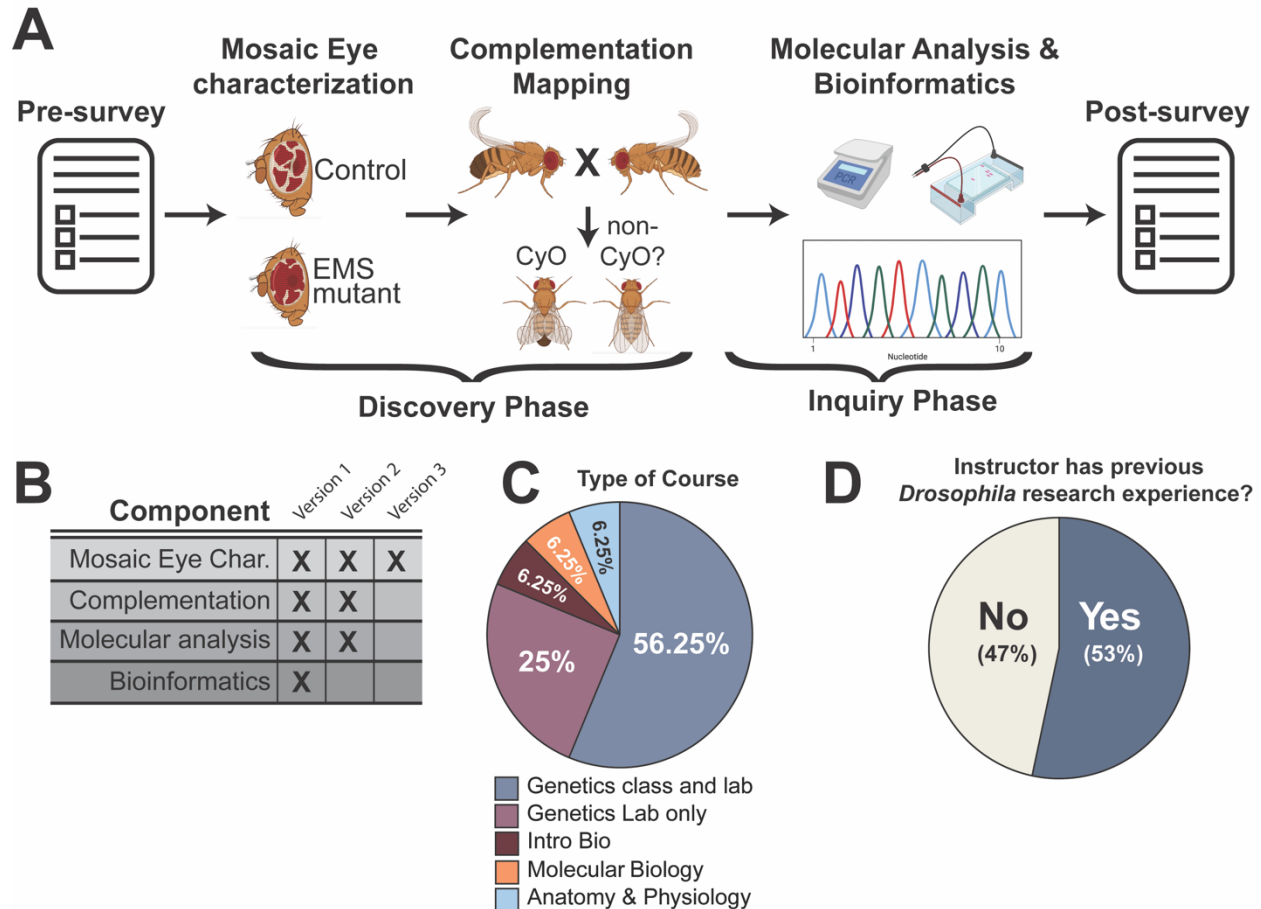

**Figure 1. The Fly-CURE is a modular course-embedded research project.** (A) Students enrolled in the Fly-CURE took an initial survey in which students reported their perceived self-efficacy in research and sense of belonging in science. The pre-course survey was also used to collect student demographic information. An FRT/Flp-based approach was used to create mitotic clones in *Drosophila* eye tissue where tissue homozygous for an EMS-induced mutation was marked by red pigment and wild-type tissue was marked by the absence of eye pigment. The growth ability of tissue homozygous for the EMS mutation was assessed by comparing the amount of red (mutant) to white (wild type) tissue within the adult fly eye. In parallel, the genomic locus of the mutation on chromosome 2R was then determined by complementation mapping with defined chromosome deletions. Once this initial “discovery” phase was completed, students initiated a more hypothesis-driven “inquiry” phase of the project. Bioinformatics and molecular approaches were used to design PCR primers and then amplify and sequence a portion of the chromosomal region that fails to complement the mutation. Finally, a post-course survey was implemented to measure the impact of the Fly-CURE on students’ perceived self-efficacy in research, sense of belonging in science, and intent to pursue additional research experiences or scientific careers. (B) Different combinations of the Fly-CURE components can be combined in a modular format, depending on the learning objectives of the course where the Fly-CURE was implemented (also see Appendix 1). (C) While most courses implementing the Fly-CURE were genetics courses with a lab or a stand-alone genetics lab course, the Fly-CURE was incorporated into a variety of other undergraduate Biology courses (Appendix 1). (D) 53% of Fly-CURE instructors (8 out of 15) had previously worked in a research setting using *Drosophila melanogaster*.

## Impacts of Fly-CURE on student outcomes

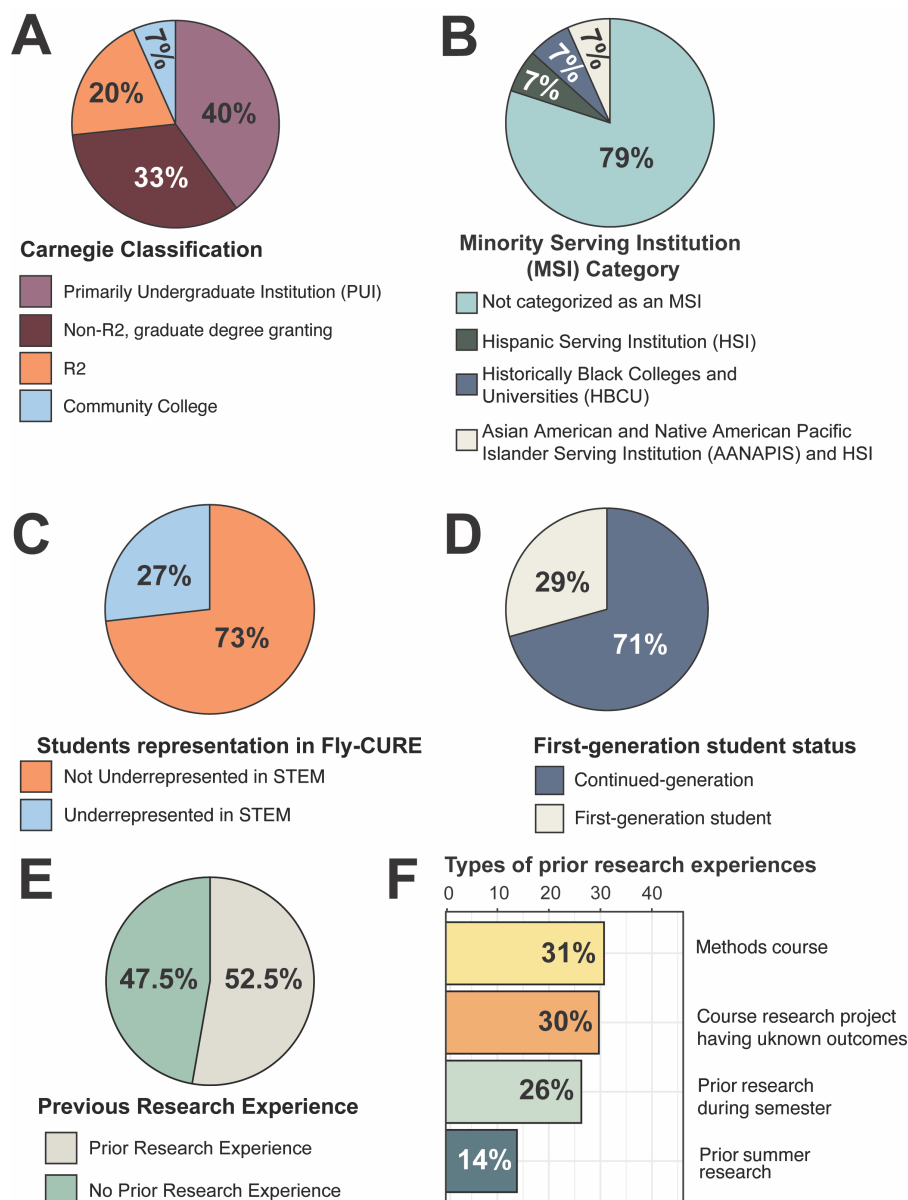

**Figure 2. Institutional, demographic, and previous research experience of students enrolled in the Fly-CURE.** (A) Institutional profiles where the Fly-CURE was implemented were obtained from The Carnegie Classification system. Institutions classified as Baccalaureate Colleges were combined into a single Primarily Undergraduate Institution (PUI) category. Carnegie Institutions classified as Doctoral/Professional Universities or Master’s Universities were pooled together as Non-R2, graduate degree-granting institutions. Number of institutions in each category: PUI (n=6), Non-R2 graduate degree-granting institutions (n=5), R2 (n=3), Community College (n=1) (see Appendix 1). (B) Minority Serving Institution (MSI) data was obtained from The Office of Postsecondary Education Eligibility Matrix. Number of institutions in each category: Non-MSI (n=12), Hispanic Serving Institution (HSI, n=1), Historically Black College or University (HBCU) (n=1), Asian American and Native Pacific Islander Serving Institution (AANAPIS) and HSI (n=1) (Appendix 1). (C-F) Demographic information from the student pre-course survey was used to determine the number of students that self-identified as underrepresented in STEM (C) or as first-generation college students (D). Pre-course survey data was also used to identify whether Fly-CURE participants had previously obtained research experience (E) and if so, the type of research experience in which students had participated (F).



## Impacts of Fly-CURE on student outcomes

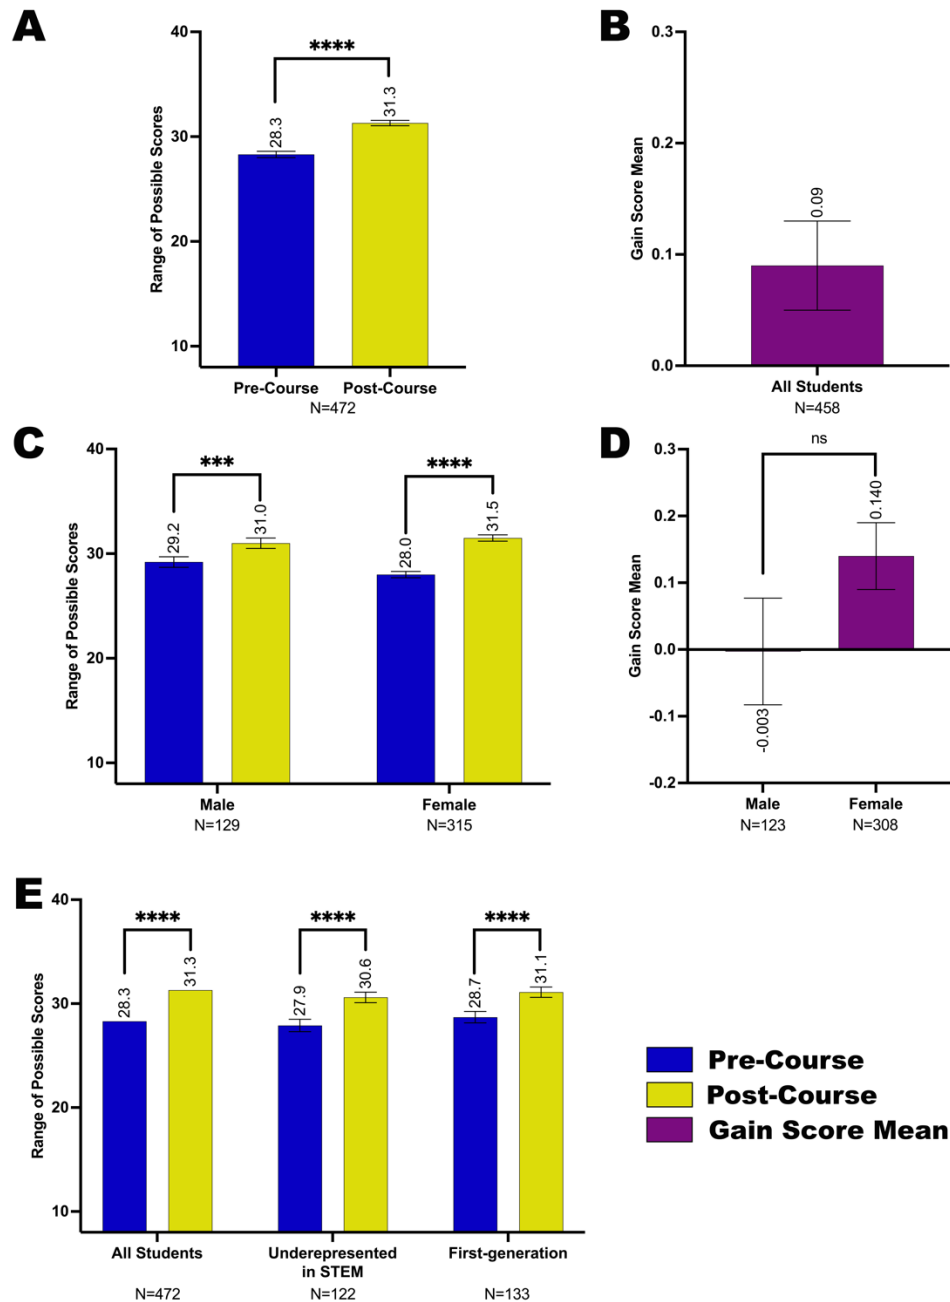

**Figure 3. Self-efficacy in scientific research of student subgroups before and after completing the Fly-CURE.** Through pre- and post-course surveys, students reported their efficacy in specific skills associated with scientific research before and after participating in the Fly-CURE. The survey rating scales for eight questions were combined, resulting in a total possible scale score of 40 ( $y$ -axis) per student. The mean self-efficacy pre-course (blue) and post-course (yellow) are shown for all participants (A) and in participant subgroups (C,E). (A-B) Self-efficacy scale score mean (A) and gain score mean (B) for all Fly-CURE participants. (C-D) Self-efficacy scale score mean (C) and gain score mean (D) for male and female participants. (E) Comparison of self-efficacy means pre- and post-course in all students, minority students underrepresented in STEM, and first-generation college students. Error bars represent  $\pm$  standard error of the mean ( $\pm$  SEM); ns, not significant,  $P > 0.05$ ; \*\*\*\* $P \leq 0.0001$ .

## Impacts of Fly-CURE on student outcomes

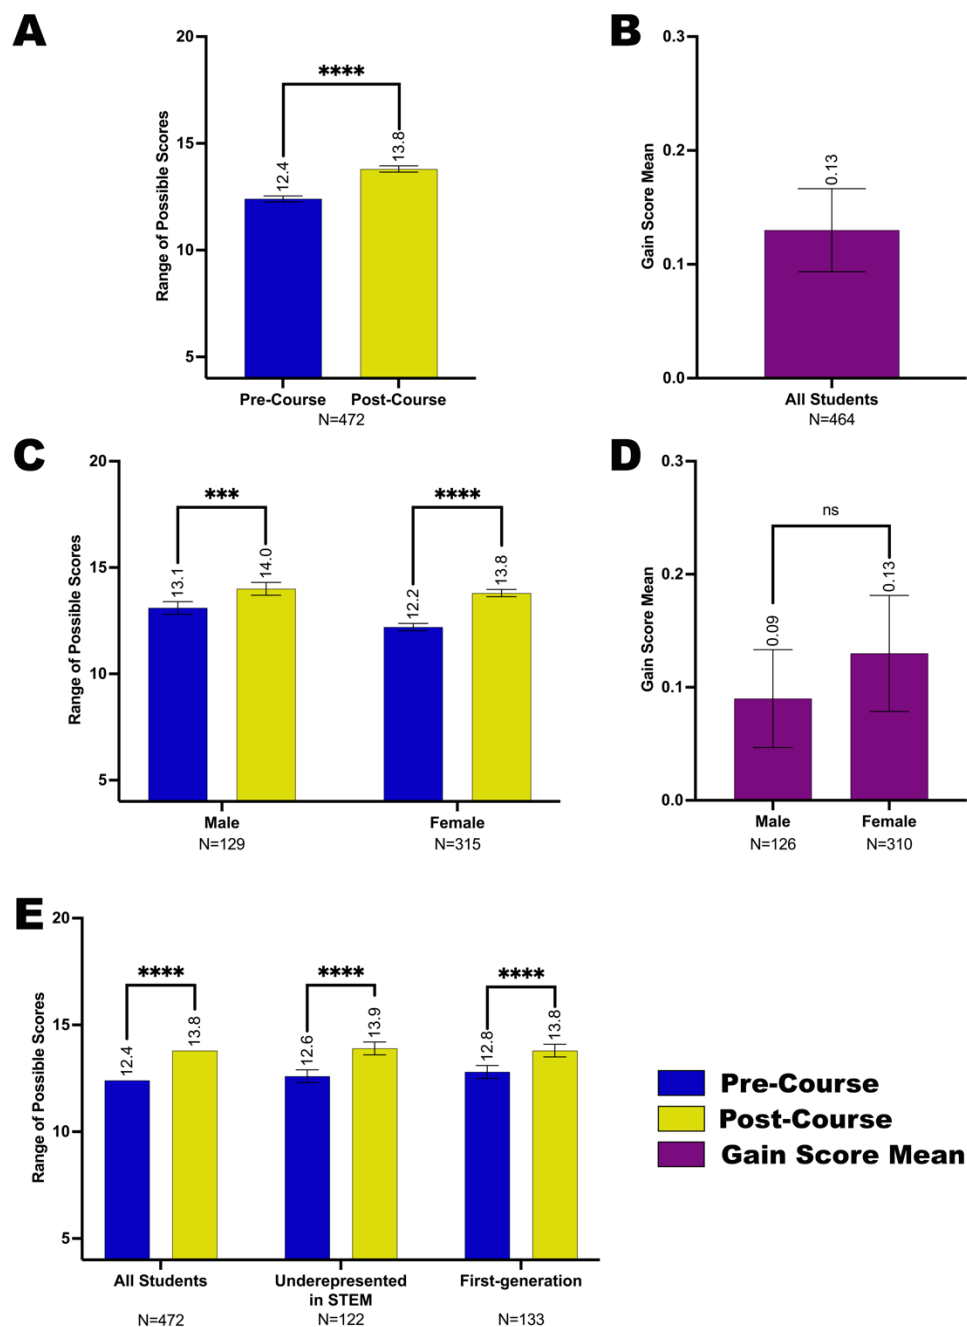

**Figure 4. Sense of belonging in the scientific community for student subgroups before and after completing the Fly-CURE.** Through pre- and post-course surveys, students reported their sense of belonging in the scientific community before and after participating in the Fly-CURE. The survey rating scales for four questions were combined, resulting in a total possible scale score of 20 (y-axis) per student. The mean scale score for sense of belonging pre-course (blue) and post-course (yellow) are shown for all participants (A) and in participant subgroups (C,E). (A-B) Sense of belonging scale score mean (A) and gain score mean (B) for all Fly-CURE participants. (C-D) Sense of belonging scale score mean (C) and gain score mean (D) for male and female students. (E) Comparison of reported scale score means for sense of belonging for all participants, minority students underrepresented in STEM, and first-generation college students. Error bars,  $\pm$ SEM; ns, not significant,  $P > 0.05$ ; \*\*\* $P \leq 0.001$ ; \*\*\*\* $P \leq 0.0001$ .

## Impacts of Fly-CURE on student outcomes

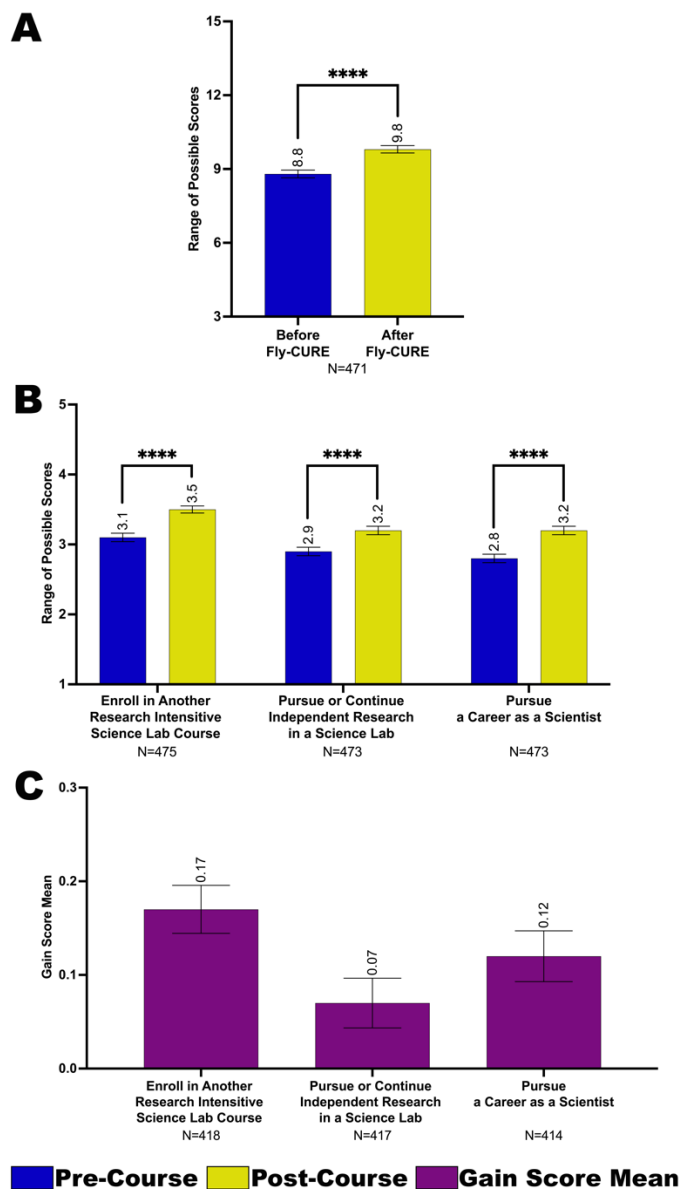

**Figure 5. Student intent to seek additional research experiences before and after completing the Fly-CURE.** Students reported their perceived interest in pursuing additional research-associated experiences before and after completing the Fly-CURE. The survey rating scales for three questions were combined, resulting in a maximum scale score of 15 (*y*-axis) per student. Students were asked to evaluate their perceived interest before and after the CURE in the categories listed in (B and C). (A-B) Scale score means for interest in seeking additional research experiences before (blue) compared to after (yellow) the Fly-CURE for all participants. (A) Scale score means across all categories. (B) Scale score means for individual categories evaluating student intent to seek additional research opportunities. (C) Gain score means comparing students' interest in pursuing additional research experiences before and after the Fly-CURE for each category evaluated. Error bars,  $\pm$ SEM; \* $P \leq 0.05$ ; \*\*\*\* $P \leq 0.0001$ .

## Impacts of Fly-CURE on student outcomes

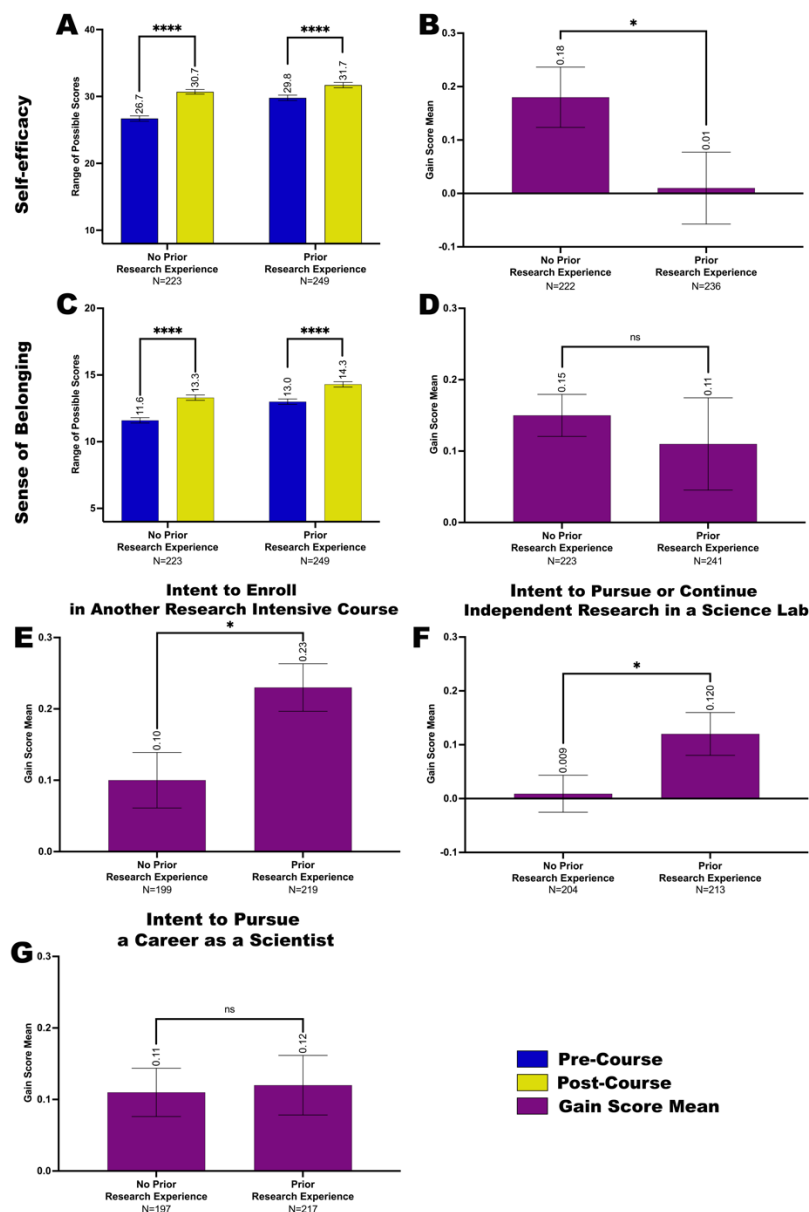

**Figure 6. Impacts of self-efficacy in scientific research, sense of belonging in the scientific community, and intent to seek additional research experiences in students with and without research experience prior to the Fly-CURE.** Through pre- and post-course surveys, students reported their self-efficacy in scientific research (A-B), sense of belonging in the scientific community (C-D), interest in pursuing additional research-associated experiences (E-G), and whether they had research experience prior to the course. (A,C) Scale score mean for research self-efficacy (A) and sense of belonging in science (C) before (blue) and after (yellow) the Fly-CURE for participants with and without prior research experience. (B,D) Gain score mean for self-efficacy (B) and sense of belonging (D) for Fly-CURE participants with and without prior research experience. (A) For research self-efficacy, the survey rating scales for eight questions were combined, resulting in a maximum score of 40 (y-axis). (C) For sense of belonging in science, the survey rating scales for four questions were summed, resulting in a combined score of 20 (y-axis). (E-G) Gain score means for students' perceived interest to enroll in another research-intensive science laboratory course (E), pursue or continue independent research in a research laboratory (F), and pursue a career as a scientist (G) before and after taking the Fly-CURE. Error bars,  $\pm$ SEM; ns, not significant,  $P > 0.05$ ; \* $P \leq 0.05$ ; \*\*\*\* $P \leq 0.0001$ .
