# Supplementary material for: Fly-CURE, a Multi-institutional CURE using Drosophila, Increases Students’ Confidence, Sense of Belonging, and Persistence in Research
Source: PubMed Central journal article supplement — bioRxiv. 2023 Jan 19:2023.01.16.524319. Preprint. [Version 1] doi: 10.1101/2023.01.16.524319 (PMC9882189; doi:10.1101/2023.01.16.524319), 2023-01-19
Supplement: media-1.pdf [file media-1.pdf]

Impacts of Fly-CURE on student outcomes

**I. Fly-CURE institutional demographics**

**A. Demographic data of general student populations at Fly-CURE institutions**

| Institution                    | State | Total student population | Under-graduate population | Undergrad -to-grad ratio | Female-to-male ratio | % minority | % Pell grant eligible | % First-generation |
|--------------------------------|-------|--------------------------|---------------------------|--------------------------|----------------------|------------|-----------------------|--------------------|
| Albion College                 | MI    | 1506                     | 1506                      | 1                        | 1.15                 | 35         | 47                    | 25                 |
| Anoka-Ramsey Community College | MN    | 11213                    | 11213                     | 1                        | 1.7                  | 30         | 15                    | 24                 |
| Frostburg State University     | MD    | 4449                     | 3677                      | 0.826                    | 1.27                 | 46         | 34                    | 26                 |
| Illinois State University      | IL    | 20233                    | 17674                     | 0.874                    | 1.5                  | 27.4       | 32                    | N/A                |
| Loyola Marymount University    | CA    | 9686                     | 6096                      | 0.629                    | 1.17                 | 47.1       | N/A                   | 10                 |
| Morehouse College              | GA    | 2554                     | 2554                      | 1                        | 0                    | 99         | 57                    | N/A                |
| Nevada State College           | NV    | 7215                     | 7201                      | 0.998                    | 2.8                  | 67         | 38.4                  | 29.4               |
| Northern Illinois University   | IL    | 16234                    | 11834                     | 0.729                    | 1.26                 | 52.65      | 50.9                  | 49.6               |
| Ohio Northern University       | OH    | 3116                     | 2191                      | 0.703                    | 0.92                 | 11         | 21                    | 16                 |
| Ohio Wesleyan University       | OH    | 1426                     | 1426                      | 1                        | 1.24                 | 22.6       | 28                    | 18.1               |
| The College of Wooster         | OH    | 1973                     | 1973                      | 1                        | 1.19                 | 22.4       | N/A                   | N/A                |
| University of Detroit Mercy    | MI    | 5227                     | 2924                      | 0.559                    | 1.61                 | 19         | 28                    | 33                 |
| University of Evansville       | IN    | 2078                     | 1796                      | 0.864                    | 1.5                  | 15         | 25                    | 16                 |
| University of St. Francis      | IL    | 3426                     | 1316                      | 0.384                    | 2.03                 | 46         | 43                    | 46                 |
| Western New Mexico University  | NM    | 3632                     | 2848                      | 0.784                    | 2                    | 51         | 62                    | 54                 |

N/A = Not available

Impacts of Fly-CURE on student outcomes

**B. Classifications and designations of Fly-CURE institutions**

| Institution                    | Specific Carnegie classification                        | General Carnegie classification  | Minority Serving Institution (MSI) category |
|--------------------------------|---------------------------------------------------------|----------------------------------|---------------------------------------------|
| Albion College                 | Baccalaureate Colleges: Arts & Sciences Focus           | PUI                              | no                                          |
| Anoka-Ramsey Community College | Associate's Colleges: High Transfer-High Nontraditional | Community college                | no                                          |
| Frostburg State University     | Master's Colleges & Universities: Larger Programs       | Masters university               | no                                          |
| Illinois State University      | Doctoral Universities: High Research Activity           | R2                               | no                                          |
| Loyola Marymount University    | Doctoral Universities: High Research Activity           | R2                               | no                                          |
| Morehouse College              | Baccalaureate Colleges: Arts & Sciences Focus           | PUI                              | HBCU                                        |
| Nevada State College           | Baccalaureate Colleges: Diverse Fields                  | PUI                              | AANAPISI and HSI                            |
| Northern Illinois University   | Doctoral Universities: High Research Activity           | R2                               | no                                          |
| Ohio Northern University       | Baccalaureate Colleges: Diverse Fields                  | PUI                              | no                                          |
| Ohio Wesleyan University       | Baccalaureate Colleges: Arts & Sciences Focus           | PUI                              | no                                          |
| The College of Wooster         | Baccalaureate Colleges: Arts & Sciences Focus           | PUI                              | no                                          |
| University of Detroit Mercy    | Doctoral/Professional Universities                      | Doctoral/Professional university | no                                          |
| University of Evansville       | Master's Colleges & Universities: Medium Programs       | Masters university               | no                                          |
| University of St. Francis      | Doctoral/Professional Universities                      | Doctoral/Professional university | no                                          |
| Western New Mexico University  | Master's Colleges & Universities: Larger Programs       | Masters university               | HSI                                         |

AANAPISI = Asian American and Native American Pacific Islander-Serving Institution; HBCU = Historically Black College or University; HSI = Hispanic Serving Institution; MSI = Minority Serving Institution; PUI = Primarily Undergraduate Institution

Impacts of Fly-CURE on student outcomes

**C. Fly-CURE modules and associated courses taught at participating institutions**

| Institution                    | Course                 | Components included in course |                             |                    |                |
|--------------------------------|------------------------|-------------------------------|-----------------------------|--------------------|----------------|
|                                |                        | Complementation mapping       | Phenotypic characterization | Molecular analysis | Bioinformatics |
| Albion College                 | Genetics               | Y                             | Y                           | Y                  | Y              |
| Anoka-Ramsey Community College | Genetics               | Y                             | Y                           | Y                  | Y              |
| Frostburg State University     | Genetics               | Y                             | Y                           | Y                  | Y              |
| Illinois State University      | Genetics               | Y                             | Y                           | Y                  | Y              |
| Loyola Marymount University    | Genetics Laboratory    | Y                             | Y                           | Y                  | Y              |
| Morehouse College              | Genetics               | Y                             | Y                           | N/A                | Y              |
| Nevada State College           | Genetics               | Y                             | Y                           | Y                  | Y              |
| Northern Illinois University   | Genetics               | Y                             | Y                           | Y                  | N              |
| Ohio Northern University       | Genetics               | Y                             | Y                           | Y                  | Y              |
| Ohio Wesleyan University       | Genetics               | Y                             | Y                           | Y                  | Y              |
| The College of Wooster         | Molecular Biology      | Y                             | Y                           | Y                  | Y              |
| University of Detroit Mercy    | Genetics Laboratory    | Y                             | Y                           | Y                  | Y              |
| University of Evansville       | Genetics               | Y                             | Y                           | Y                  | Y              |
| University of St. Francis      | Introductory Biology   | Y                             | Y                           | Y                  | Y              |
| Western New Mexico University  | Anatomy and Physiology | N                             | Y                           | N                  | N              |

Y = Yes; N = No; N/A = not available

Impacts of Fly-CURE on student outcomes

**II. Fly-CURE student demographics**

**A. Gender**

|         |                   | Frequency | Percent | Valid Percent |
|---------|-------------------|-----------|---------|---------------|
| Valid   | Male              | 130       | 27      | 28            |
|         | Female            | 318       | 66      | 69            |
|         | Not listed        | 4         | 1       | 1             |
|         | Prefer not to say | 8         | 2       | 2             |
|         | Total             | 460       | 96      | 100           |
| Missing | Blank             | 20        | 4       |               |
| Total   |                   | 480       | 100     |               |

**B. Academic year**

|         |                                  | Frequency | Percent | Valid Percent |
|---------|----------------------------------|-----------|---------|---------------|
| Valid   | Freshman                         | 20        | 4       | 4             |
|         | Sophomore                        | 156       | 33      | 34            |
|         | Junior                           | 143       | 30      | 31            |
|         | Senior                           | 132       | 28      | 29            |
|         | Already have a bachelor's degree | 9         | 2       | 2             |
|         | Total                            | 460       | 96      | 100           |
| Missing | Blank                            | 20        | 4       |               |
| Total   |                                  | 480       | 100     |               |

Impacts of Fly-CURE on student outcomes

**C. Student rank (combined)**

|         |                                             | Frequency | Percent | Valid Percent |
|---------|---------------------------------------------|-----------|---------|---------------|
| Valid   | Freshman/Sophomore                          | 176       | 37      | 38            |
|         | Junior/Senior/Already has bachelor's degree | 284       | 59      | 62            |
|         | Total                                       | 460       | 96      | 100           |
| Missing | Blank                                       | 20        | 4       |               |
| Total   |                                             | 480       | 100     |               |

**D. Underrepresented in STEM**

|         |                              | Frequency | Percent | Valid Percent |
|---------|------------------------------|-----------|---------|---------------|
| Valid   | Not Underrepresented in STEM | 335       | 70      | 73            |
|         | Underrepresented in STEM     | 124       | 26      | 27            |
|         | Total                        | 459       | 96      | 100           |
| Missing | Blank                        | 21        | 4       |               |
| Total   |                              | 480       | 100     |               |

**E. First generation student status**

|         |                                                                       | Frequency | Percent | Valid Percent |
|---------|-----------------------------------------------------------------------|-----------|---------|---------------|
| Valid   | First generation student (neither mother nor father attended college) | 134       | 28      | 29            |
|         | Continued generation student (one or both parents attended college)   | 323       | 67      | 71            |
|         | Total                                                                 | 457       | 95      | 100           |
| Missing | Blank                                                                 | 23        | 5       |               |
| Total   |                                                                       | 480       | 100     |               |

Impacts of Fly-CURE on student outcomes

**F. Previous research experience**

|       |                        | Frequency | Percent | Valid Percent |
|-------|------------------------|-----------|---------|---------------|
| Valid | No research exposure   | 228       | 48      | 48            |
|       | Some research exposure | 252       | 53      | 53            |
|       | Total                  | 480       | 100     | 100           |

**G. Types of prior research experiences**

|                                                                               | Yes       |         | No        |         | Total |
|-------------------------------------------------------------------------------|-----------|---------|-----------|---------|-------|
|                                                                               | Frequency | Percent | Frequency | Percent |       |
| a. Took one or more Introduction to Research OR Research Methods courses      | 147       | 31      | 332       | 69      | 479   |
| b. Took a course where the outcome of the research was not already known      | 142       | 30      | 336       | 70      | 478   |
| c. Did research during the summer with a research mentor (PI or grad student) | 66        | 14      | 413       | 86      | 479   |
| d. Did research during the semester with a research mentor                    | 126       | 26      | 354       | 74      | 480   |

## Impacts of Fly-CURE on student outcomes

### Fly-CURE Course Pre-Survey [selected questions]

1. Are you: (check all that apply)
  - Native Hawaiian or other Pacific Islander (original peoples)
  - American Indian or Alaskan Native
  - Asian (including subcontinent and Philippines)
  - Black or African American (including African and Caribbean)
  - White
2. Are you Hispanic or Latino?
  - Yes
  - No
3. Are you of Middle Eastern descent (including Arab states, Israel, Turkey, Afghanistan, Iran, Pakistan, Egypt, Iraq, and Saudi Arabia)?
  - Yes
  - No
4. What is your gender?
  - Male
  - Female
  - Not listed
  - Prefer not to say
5. What is your current academic standing?
  - Freshman
  - Sophomore
  - Junior
  - Senior
  - Already have my bachelor's degree
6. Has either your mother or father attended any college?
  - Both mother and father attended college
  - Only mother attended college
  - Only father attended college
  - Neither mother nor father attended college
7. Which of these previous research experiences have you had?
  - a. Took one or more Introduction to Research or Research Methods courses?
    - i. Yes
    - ii. No
  - b. Took a course where the outcome of the research was not already known?
    - i. Yes
    - ii. No
  - c. Did research during the summer with a research mentor (PI or grad student)?
    - i. Yes
    - ii. No
  - d. Did research during the semester with a research mentor?
    - i. Yes
    - ii. No
  - e. Presented my research to others at my university?

Impacts of Fly-CURE on student outcomes

- i. Yes
- ii. No
- f. Presented my research outside of my university?
  - i. Yes
  - ii. No
- g. Had some other kind of research experience prior to this course?
  - i. Yes (please describe this experience below)
  - ii. No

8. Please tell us how confident you feel, now, about each of these...

|                                                                                      | 1 –<br>Not at all | 2 | 3 | 4 | 5 –<br>Completely |
|--------------------------------------------------------------------------------------|-------------------|---|---|---|-------------------|
| I can use research tools, instruments, or techniques to measure concepts of interest |                   |   |   |   |                   |
| I can generate a research question to answer                                         |                   |   |   |   |                   |
| I can figure out what data/observations to collect and how to collect them           |                   |   |   |   |                   |
| I can explain the results of a study                                                 |                   |   |   |   |                   |
| I can use scientific literature and/or reports to guide research                     |                   |   |   |   |                   |
| I can integrate results from multiple studies into a theme or theory                 |                   |   |   |   |                   |
| I can solve problems through research                                                |                   |   |   |   |                   |
| I can explain my scientific research to others                                       |                   |   |   |   |                   |

9. Please tell us how strongly you agree or disagree with each of these...

|                                                   | Strongly disagree | Disagree | Neutral | Agree | Strongly agree |
|---------------------------------------------------|-------------------|----------|---------|-------|----------------|
| I feel I belong to a community of researchers     |                   |          |         |       |                |
| I have come to think of myself as a 'researcher'  |                   |          |         |       |                |
| I feel like I belong in the field of research     |                   |          |         |       |                |
| I gain satisfaction from doing important research |                   |          |         |       |                |
| Please mark "neutral" for this item               |                   |          |         |       |                |



Impacts of Fly-CURE on student outcomes

**Fly-CURE Course Post-Survey** [selected questions]

1. How interested are you in taking another science lab course that incorporates research where the outcome is not known?
  - Very interested
  - Somewhat interested
  - Not interested at all

2. How likely are you to:

|                                                              | Not likely | A little likely | Somewhat likely | Very likely | Definitely |
|--------------------------------------------------------------|------------|-----------------|-----------------|-------------|------------|
| a) Enroll in another research intensive science lab course?  |            |                 |                 |             |            |
| b) Pursue or continue independent research in a science lab? |            |                 |                 |             |            |
| c) Pursue a career as a scientist?                           |            |                 |                 |             |            |

3. Compared to your intentions **BEFORE** taking this course, **HOW LIKELY ARE YOU NOW** to:

|                                                              | Not more likely | A little more likely | Somewhat more likely | Much more likely | Extremely more likely |
|--------------------------------------------------------------|-----------------|----------------------|----------------------|------------------|-----------------------|
| a) Enroll in another research intensive science lab course?  |                 |                      |                      |                  |                       |
| b) Pursue or continue independent research in a science lab? |                 |                      |                      |                  |                       |
| c) Pursue a career as a scientist?                           |                 |                      |                      |                  |                       |

4. Please tell us how confident you feel, now, about each of these...

|                                                                                      | 1 – Not at all | 2 | 3 | 4 | 5 – Completely |
|--------------------------------------------------------------------------------------|----------------|---|---|---|----------------|
| I can use research tools, instruments, or techniques to measure concepts of interest |                |   |   |   |                |
| I can generate a research question to answer                                         |                |   |   |   |                |
| I can figure out what data/observations to collect and how to collect them           |                |   |   |   |                |
| I can explain the results of a study                                                 |                |   |   |   |                |
| I can use scientific literature and/or reports to guide research                     |                |   |   |   |                |

Impacts of Fly-CURE on student outcomes

|                                                                      |  |  |  |  |  |
|----------------------------------------------------------------------|--|--|--|--|--|
| I can integrate results from multiple studies into a theme or theory |  |  |  |  |  |
| I can solve problems through research                                |  |  |  |  |  |
| I can explain my scientific research to others                       |  |  |  |  |  |

5. Please tell us how strongly you agree or disagree with each of these...

|                                                   | Strongly disagree | Disagree | Neutral | Agree | Strongly agree |
|---------------------------------------------------|-------------------|----------|---------|-------|----------------|
| I feel I belong to a community of researchers     |                   |          |         |       |                |
| I have come to think of myself as a 'researcher'  |                   |          |         |       |                |
| I feel like I belong in the field of research     |                   |          |         |       |                |
| I gain satisfaction from doing important research |                   |          |         |       |                |
| Please mark "neutral" for this item               |                   |          |         |       |                |
